# Supplementary material for: Effects of new dock-less bicycle-sharing programs on cycling: a retrospective study in Shanghai
Source: PubMed Central journal article supplement — BMJ Open. 2019 Feb 9;9(2):e024280. doi: 10.1136/bmjopen-2018-024280 (PMC6398781; doi:10.1136/bmjopen-2018-024280), 2019-02-09
Supplement: bmjopen-2018-024280.draft_revisions.pdf [file bmjopen-2018-024280.draft_revisions.pdf]

# BMJ Open

BMJ Open is committed to open peer review. As part of this commitment we make the peer review history of every article we publish publicly available.

When an article is published we post the peer reviewers' comments and the authors' responses online. We also post the versions of the paper that were used during peer review. These are the versions that the peer review comments apply to.

The versions of the paper that follow are the versions that were submitted during the peer review process. They are not the versions of record or the final published versions. They should not be cited or distributed as the published version of this manuscript.

BMJ Open is an open access journal and the full, final, typeset and author-corrected version of record of the manuscript is available on our site with no access controls, subscription charges or pay-per-view fees (<http://bmjopen.bmj.com>).

If you have any questions on BMJ Open's open peer review process please email [info.bmjopen@bmj.com](mailto:info.bmjopen@bmj.com)

# BMJ Open

## Effects of new mobile bicycle-sharing programs on cycling: a retrospective study in Shanghai

|                               |                                                                                                                                                                       |
|-------------------------------|-----------------------------------------------------------------------------------------------------------------------------------------------------------------------|
| Journal:                      | <i>BMJ Open</i>                                                                                                                                                       |
| Manuscript ID                 | bmjopen-2018-024280                                                                                                                                                   |
| Article Type:                 | Research                                                                                                                                                              |
| Date Submitted by the Author: | 23-May-2018                                                                                                                                                           |
| Complete List of Authors:     | Jia, Yingnan<br>Ding, Ding; The University of Sydney<br>Gebel, Klaus<br>Chen, Lili<br>Zhang, Sen<br>Ma, Zhicong<br>Fu, Hua; School of Public Health, Fudan University |
| Keywords:                     | bicycle-sharing, cycling, travel mode, active travel, built environment, social norms                                                                                 |
|                               |                                                                                                                                                                       |

SCHOLARONE™  
Manuscripts

Peer Review Only

**Title :** Effects of new mobile bicycle-sharing programs on cycling: a retrospective study in Shanghai

**Author names:** Yingnan Jia<sup>1,2</sup>, Ding Ding<sup>3,4\*</sup>, Klaus Gebel<sup>3,5,6</sup>, Lili Chen<sup>1,2</sup>, Sen Zhang<sup>1,2</sup>, Zhicong Ma<sup>1,2</sup>, and Hua Fu<sup>1,2\*</sup>

**Affiliations:**

1 School of Public Health, Key Lab of Public Health Safety of the Ministry of Education, Fudan University, Shanghai 200032, China

2 Health Communication Institute, Fudan University, Shanghai 200032, China

3 Prevention Research Collaboration, Sydney School of Public Health, University of Sydney, Camperdown, New South Wales, Australia

4 The Charles Perkins Centre, University of Sydney, Camperdown, New South Wales, Australia

5 School of Allied Health, Australian Catholic University, North Sydney, New South Wales, Australia

6 Centre for Chronic Disease Prevention, School of Public Health, Tropical Medicine and Rehabilitation Sciences, James Cook University, Smithfield, Queensland, Australia

**Email:** Yingnan Jia: [jyn@fudan.edu.cn](mailto:jyn@fudan.edu.cn); Ding Ding: [melody.ding@sydney.edu.au](mailto:melody.ding@sydney.edu.au);

Klaus Gebel: [Klaus.Gebel@acu.edu.au](mailto:Klaus.Gebel@acu.edu.au); Lili Chen: [16211020043@fudan.edu.cn](mailto:16211020043@fudan.edu.cn); Sen

Zhang: [12307120117@fudan.edu.cn](mailto:12307120117@fudan.edu.cn); Zhicong Ma: [mazc14@fudan.edu.cn](mailto:mazc14@fudan.edu.cn); Hua Fu:

[hfu@fudan.edu.cn](mailto:hfu@fudan.edu.cn).

**\*Corresponding author information:**

Address correspondence to: Hua Fu, PO Box 248, 138 Yixueyuan Road, Shanghai 200032, China. Tel: 86-21-54237327. E-mail: [hfu@fudan.edu.cn](mailto:hfu@fudan.edu.cn)

Address correspondence to: Ding Ding, Level 6, The Charles Perkins Centre (D17),

1  
2  
3 the University of Sydney, NSW, Australia, 2006; Tel +61 2 8627 1842; Fax +61 2  
4  
5 9036 3184; E-mail: [melody.ding@sydney.edu.au](mailto:melody.ding@sydney.edu.au)  
6

7 Word count: 2890  
8  
9  
10  
11  
12  
13  
14  
15  
16  
17  
18  
19  
20  
21  
22  
23  
24  
25  
26  
27  
28  
29  
30  
31  
32  
33  
34  
35  
36  
37  
38  
39  
40  
41  
42  
43  
44  
45  
46  
47  
48  
49  
50  
51  
52  
53  
54  
55  
56  
57  
58  
59  
60

For peer review only

**Abstract**

**Objectives** To examine 1) the effect of new mobile bicycle-sharing programs on change in travel mode and 2) the correlates of change in travel mode.

**Design** A retrospective natural experimental study

**Setting** 12 neighborhoods in Shanghai.

**Participants** 1265 respondents were recruited for a retrospective study in May 2017.

**Main outcome measures** Prevalence of cycling. Determination of association between sociodemographic characteristics, social norms, and travel mode before and after the advent of the new mobile bicycle-sharing programs as well as perceived bikeability of the environment.

**Results** The proportion of participants cycling for transport increased from 33.3% prior to the launch of the bicycle-sharing programs to 48.3% one year after the launch ( $p < 0.001$ ). Among those reporting no cycling before the launch, participants aged 30 to 49 years (OR=2.28 (95% CI 1.30-4.00)) compared with those aged 50+) and participants who lived within the inner ring (OR=2.27 (95% CI 1.22-4.26) compared with those between the inner and middle ring) were more likely to adopt cycling for transport. Dedicated bicycle lanes (OR=1.37, 95% CI 1.12-1.68) and perceiving riding shared bicycles as fashionable (OR=1.46, 95% CI 1.21-1.76) were positively and access to a public transportation stop/station (OR=0.82, 95% CI 0.67-0.99) inversely correlated with adopting cycling for transport.

**Conclusions** Mobile bicycle-sharing may promote bicycle use in a metropolitan setting. Findings from this study also highlight the importance of built environments and cultural norms as moderators of the uptake of mobile bicycle-sharing.

**Keywords:** bicycle-sharing; cycling; travel mode; active travel; built environment; social norms

## Introduction

Regular physical activity (PA) reduces the risk of major chronic diseases and premature mortality.<sup>1</sup> However, around the world large proportions of the population are not sufficiently active or completely inactive which has significant health and economic consequences.<sup>2-5</sup> Active transportation by cycling has the potential to contribute considerably to overall activity levels of adults and is associated with significant health benefits.<sup>6-11</sup> Moreover, greater use of bicycles for day-to-day travel provides wider benefits, including reductions in carbon emissions, air pollution, and traffic congestion.<sup>10,12</sup> In Chinese cities, cycling was once a conventional mode of travel for most people, to the point that the country was once referred to as the “Kingdom of Bicycles”.<sup>12</sup> However, since the turn of the century, Chinese cities have become increasingly cycling-unfriendly due to increasing car ownership and car-oriented urban planning policies such as the conversion of non-motorized to motorized lanes and banning non-motorized vehicles from arterial roads in some cities.<sup>13</sup> With the economic development and booming car industry, between 2002 and 2010-2012, the proportion of people using motorized transport increased from 33.5% to 61.9%, while the proportion traveling by bicycle and walking decreased from 35.8% and 30.7% to 15.6% and 22.5%, respectively.<sup>14</sup>

As a strategy for promoting cycling and sustainable transportation overall, public bicycle-sharing programs (PBSP) have been introduced in many cities around the world to provide bicycles as a mode of transportation for relatively short trips and to bridge “the last mile” of public transport services.<sup>15,16</sup> These PBSPs usually have docking stations where users obtain and return the rental bikes.<sup>17</sup> Although some studies have shown that cycling has increased in some cities that are operating PBSPs, such as Washington DC, Dublin, Beijing and Hangzhou, China, there are still some

1  
2  
3 common problems and challenges for conventional PBSPs, which may have limited  
4 their reach and usage at a population level, such as reliance on docking stations,  
5  
6 inconvenience in payment and insufficient supply of shared bicycles.<sup>15,18-20</sup>  
7  
8

9  
10 With the increasing popularity of smart phone payments, Global Positioning System  
11 (GPS) tracking and other technology, mobile bicycle-sharing provides opportunities  
12 for promoting active travel. Dock-less PBSPs utilize mobile-controlled wheel lock  
13 and GPS tracking, so that users can locate the nearest bicycle, unlock and lock the  
14 bicycle, and pay (usually, around 1RMB~0.15 USD per half hour) through a mobile  
15 app. Moreover, some of the shared bicycles (e.g., Mobike) have solid tires, which are  
16 durable and low-maintenance. Dock-less PBSPs are currently deployed in many cities  
17 in China such as Shanghai, Beijing, and Guangzhou.<sup>21</sup> As of May 2017, a total of 10  
18 million mobile shared bicycles had been deployed in China, 1.5 million of which in  
19 Shanghai, which led the government to ban additional shared bicycles.<sup>22,23</sup> However,  
20 there has been limited evidence on the effectiveness of dock-less mobile  
21 bicycle-sharing systems in promoting travel mode change.<sup>24</sup> Further, the introduction  
22 of the bicycle-sharing scheme alone may not lead to population-level uptake, as  
23 individual behaviors may be influenced by various factors. In line with  
24 social-ecological models, previous research suggests that population-level cycling  
25 behavior is associated with a range of individual- and environmental-level  
26 characteristics, all of which have rarely been examined in evaluations of PBSPs.<sup>25,26-28</sup>  
27  
28 An ecological framework can guide inquiry into a more comprehensive understanding  
29 of the factors that influence cycling behaviors in the context of PBSP.<sup>25</sup> Therefore, this  
30 study aims to 1) evaluate whether the introduction of mobile dock-less  
31 bicycle-sharing programs leads to more cycling, and 2) to examine correlates of  
32 initiation of cycling, including sociodemographic characteristics and perceived built  
33  
34  
35  
36  
37  
38  
39  
40  
41  
42  
43  
44  
45  
46  
47  
48  
49  
50  
51  
52  
53  
54  
55  
56  
57  
58  
59  
60

1  
2  
3 and social environments.  
4  
5  
6

## 7 **MATERIALS AND METHODS**

### 8 **Patient and Public Involvement**

9  
10  
11 Written informed consent statement forms about the development of the research  
12  
13 question and outcome measures were obtained from participants. The right to  
14  
15 withdraw, autonomy of responses and requirement of results were also explained. An  
16  
17 intercept convenient sample survey of 12 community residents was conducted. This  
18  
19 study received ethical approval from the ethics committee of School of Public Health  
20  
21 of Fudan University, China (IRB00002408 & FWA0002399).  
22  
23  
24  
25

### 26 **Design**

27  
28 A retrospective study was conducted in May 2017 where participants were asked to  
29  
30 report travel modes after and retrospectively before the launch of city-wide mobile  
31  
32 PBSPs.  
33  
34  
35  
36

### 37 **Intervention**

38  
39 Mobile bicycle-sharing systems can be considered as a city-level intervention for  
40  
41 travel mode. The system was officially launched in Shanghai in April 2016. By July  
42  
43 2017, there were more than 13 million registered users and more than 1 million  
44  
45 mobile shared bicycles in Shanghai.<sup>29</sup> The development of mobile shared bicycles was  
46  
47 so rapid in China that it limited the opportunities for prospective data collection or  
48  
49 inclusion of a control city comparable to Shanghai, but without a bicycle-sharing  
50  
51 system. Therefore, a retrospective study design was used.  
52  
53  
54  
55  
56  
57  
58  
59  
60



### **Study areas and recruitment of participants**

To explore the correlates of travel mode, a two-stage sampling method was employed. First, based on the Shanghai Transportation Map, the city was divided into four areas: within the inner ring, between the inner and middle rings, between the middle and outer rings, and beyond the outer ring. Then, three neighborhoods were selected in each of the four areas of Shanghai by purposive sampling. The selection criteria for neighborhoods were determined as follows: (1) within 1-2 km distance from the nearest subway station; (2) the number of residents within the neighborhood was more than 1,000. Within each selected neighborhood, trained interviewers conducted at least 100 self-administered intercept surveys in May 2017. The inclusion criteria for participants were (1) being 18-70 years old; (2) having lived in the selected neighborhood for more than 3 months; and (3) being physically capable of riding a bicycle. Altogether, 1265 respondents were sampled from 12 neighborhoods. After excluding 100 respondents with more than 20% missing data, 1165 respondents (92.1%) remained in the analysis.

### **Measurements**

#### **Travel mode**

Travel mode before and after the advent of the mobile PBSPs was assessed by asking respondents two questions: (1) How did you travel most of the time before the advent of mobile PBSPs? (2) How have you been travelling most of the time after the advent of mobile PBSPs? Respondents selected one of the following options, including walking, cycling, by car, public transport (subway, bus, ferry, and shuttle bus), motorcycles/electric motorcycles, combined public transport with walking (>500m),

1  
2  
3 combined public transport with cycling, do not travel (staying at home), and other.  
4  
5 According to respondents' travel mode before and after the advent of mobile PBSPs,  
6  
7 they were classified into cyclists and non-cyclists at both time points. Cyclists were  
8  
9 defined as participants who traveled by bicycle or those who combined cycling and  
10  
11 public transport most of the time.  
12  
13  
14  
15

### 16 **Perceived bikeability**

17  
18 To date, only few instruments have been developed to measure perceived  
19  
20 bicycle-friendliness of neighborhood environments and most of these were developed  
21  
22 for the physical environments of Western countries.<sup>30</sup> A new scale for measuring  
23  
24 Chinese neighborhood bikeability was developed based on existing instruments,  
25  
26 literature reviews, field visits, and expert consultation. Specifically, we adopted five  
27  
28 questions (i.e., distance to a public transportation stop/station, access to destinations,  
29  
30 physical condition of bicycle lanes, maintenance of lanes, and vegetation/shades along  
31  
32 the bicycle lanes) from the Chinese Walkable Environment Scale (CWES) for urban  
33  
34 community residents.<sup>31</sup> Based on consultation with several Chinese local physical  
35  
36 activity experts to discuss potential correlates and determinants of cycling, we added  
37  
38 four questions to the survey, including the presence of dedicated bicycle lanes, and  
39  
40 the degree to which traffic violations, traffic volume, and motorbikes/electric scooters  
41  
42 impede cycling. Finally, this instrument was pilot-tested and adjusted prior to the  
43  
44 survey. All bikeability variables were on a 5-point scale and the composite score was  
45  
46 analyzed as a continuous variable. More details about the questions are provided in  
47  
48 Appendix 1.  
49  
50  
51  
52  
53  
54

### 55 **Social norms**

Two survey items assessed social norms by the statements “Riding mobile shared bicycles is fashionable” and “Riding mobile shared bicycles represents low socioeconomic status”. Each item was rated on a 5-point scale, from 1 (strongly disagree) to 5 (strongly agree).

### **Demographic variables and other covariates**

Self-reported sociodemographic variables included gender, age, education, personal monthly income, and marital status. Age was categorized as <30, 30-49, and  $\geq$ 50 years. Educational attainment was categorized as  $\leq$  junior high school, high school/technical secondary school, junior college, and university and higher. Monthly income was categorized as <¥2000, ¥2000-4999, ¥5000-9999, and  $\geq$ ¥10000 (1 CNY=0.15 USD in May 2017). In addition, questions about motor vehicle and bicycle ownership and characteristics of the commute were asked, including the following: (1) what is the distance between your home and work/college/university, and (2) how long does it take you to go to work/college/university every day, both of which were converted to categorical variables.

### **Statistical analysis**

McNemar’s test was used to examine the change in travel mode after the introduction of the mobile PBSPs. To explore the potential correlates of change in travel mode, we focused on the participants who did not cycle before the bicycle-sharing became available and classified them as those who (1) changed from not cycling to cycling, and (2) remained not cycling as their travel mode. More details can be found in the consort flow diagram (Figure 1). Because the data were hierarchical in nature (individuals clustered within neighborhoods), we explored multi-level modeling.

1  
2  
3 However, upon examination of the outcome variable, we decided against multi-level  
4 modeling because the intraclass correlation coefficient was merely 0.0645 and we  
5 only found a significant random effect in one out of 12 neighborhoods. Therefore,  
6  
7 logistic regression was conducted to examine the association of socio-demographic  
8 variables, perceived bikeability, and social norms with change in cycling behavior.  
9  
10 Sequential modeling was used with Model 1 including only sociodemographic  
11 variables, Model 2 including sociodemographic and bikeability variables, and Model  
12 3 additionally including social norms. Statistical analysis was performed using  
13  
14 Statistical Package for Social Sciences 20.0 (Chicago, SPSS, Inc.) and the  
15  
16 significance level was set at 0.05.  
17  
18  
19  
20  
21  
22  
23  
24  
25

## 26 **RESULTS**

27  
28 The demographic characteristics of the study sample are reported in Table 1. The final  
29 sample consisted of 1,165 participants from 12 neighborhoods. Nearly 40% of the  
30 participants were 30 to 49 years old, and over 75% were married. More than 40%  
31 reported an income level between 2000 and 4999 RMB/month. Over 75% of the  
32 participants owned bicycles, while nearly half of the participants had motor vehicles.  
33  
34 The average distance from work/college/university was 5.6 km, while the average  
35  
36 commuting time was 26.6 minutes.  
37  
38  
39  
40  
41  
42  
43  
44  
45  
46  
47  
48  
49  
50  
51  
52  
53  
54  
55  
56  
57  
58  
59  
60

**Table 1. Participant characteristics**

| Variable                                  |                                        | n (%)      |
|-------------------------------------------|----------------------------------------|------------|
| Gender                                    | Male                                   | 587 (50.5) |
|                                           | Female                                 | 575 (49.5) |
| Age, years                                | 18-29                                  | 297 (25.5) |
|                                           | 30-49                                  | 460 (39.5) |
|                                           | ≥50                                    | 408 (35.0) |
| Education                                 | Junior high school                     | 289 (25.2) |
|                                           | High school/technical secondary school | 339 (29.5) |
|                                           | Junior college                         | 210 (18.3) |
|                                           | University and above                   | 310 (27.0) |
| Personal monthly income (RMB)             | <2000                                  | 203 (17.5) |
|                                           | 2000-4999                              | 504 (43.4) |
|                                           | 5000-9999                              | 329 (28.3) |
|                                           | >10000                                 | 125 (10.8) |
| Marital status                            | Married                                | 891 (76.5) |
|                                           | Unmarried/Divorced/Widowed             | 274 (23.5) |
| Area of residence                         | Within the inner ring                  | 284 (24.4) |
|                                           | Between the inner and middle rings     | 265 (22.7) |
|                                           | Between the middle and outer rings     | 316 (27.1) |
|                                           | Beyond the outer ring                  | 300 (25.8) |
| Ownership of bicycle                      | Yes                                    | 879 (75.5) |
|                                           | No                                     | 286 (24.5) |
| Ownership of motor vehicle                | Yes                                    | 550 (47.2) |
|                                           | No                                     | 615 (52.8) |
| Distance from work / college / university | <1.5km                                 | 282 (25.0) |
|                                           | 1.5-5km                                | 432 (38.2) |
|                                           | >5km                                   | 319 (28.2) |
| Commuting time (one way)                  | Staying at home/ Not working           | 97 (8.6)   |
|                                           | <15min                                 | 359 (31.8) |
|                                           | 15-30min                               | 416 (36.8) |
|                                           | >30min                                 | 257 (22.8) |
|                                           | Staying at home / Not working          | 97 (8.6)   |

### Change in travel mode

Before the launch of the mobile PBSPs, 33.3% of the participants cycled for transport which increased significantly to 48.3% after the launch ( $p<0.001$ ). Among the participants who usually travelled by car/motorcycles/electric motorcycles,

1  
2  
3 walking/walking combined with public transport, and public transport before the  
4 launch of the mobile PBSPs, there were 115 (28.4%), 50 (28.2%), and 28 (29.2%)  
5  
6 participants who adopted cycling after the launch, respectively.  
7  
8  
9

### 10 11 **Correlates of initiating commuting cycling** 12

13 As shown in Table 2, in Model 1, participants who were <30 and 30-49 years old had  
14 more than twice the odds of adopting commuting cycling than participants who were  
15 50 and older. Participants who lived within the inner ring had more than twice the  
16 odds to adopt cycling compared with those who lived in the area between the inner  
17 and middle rings. Participants living more than 5km from work/college/university had  
18 more than twice the odds of initiating cycling compared with those living within  
19 1.5km from work/college/university. In Model 2, presence of dedicated bicycle lanes  
20 was positively associated with adopting cycling. Model 3 showed that participants  
21 who owned motor vehicles were more likely to adopt cycling than those without  
22 motor vehicles. In Model 3, access to a public transportation stop/station was  
23 inversely associated with adopting cycling, and perceiving riding mobile shared  
24 bicycles as fashionable was positively correlated with adopting cycling. Meanwhile,  
25 the perception that riding mobile shared bicycles represents low socio-economic  
26 status was inversely correlated with adopting cycling.  
27  
28  
29  
30  
31  
32  
33  
34  
35  
36  
37  
38  
39  
40  
41  
42  
43  
44  
45  
46  
47  
48  
49  
50  
51  
52  
53  
54  
55  
56  
57  
58  
59  
60

**Table 2. Predictors of adopting cycling**

| <b>Demographic characteristics</b>           | Model 1 (n=645)<br>OR (95% CI) | Model 2 (n=641)<br>OR (95% CI) | Model 3 (n=641)<br>OR (95% CI) |
|----------------------------------------------|--------------------------------|--------------------------------|--------------------------------|
| <b>Gender</b>                                |                                |                                |                                |
| Female (ref)                                 | 1.00                           | 1.00                           | 1.00                           |
| Male                                         | 0.81 (0.56-1.16)               | 0.73 (0.50-1.06)               | 0.75 (0.51-1.11)               |
| <b>Age (years)</b>                           |                                |                                |                                |
| ≥50 (ref)                                    | 1.00                           | 1.00                           | 1.00                           |
| 30-49                                        | 2.26 (1.32-3.87)**             | 2.31(1.33-4.00)**              | 2.28(1.30-4.00)**              |
| <30                                          | 2.23 (1.18-4.21)*              | 2.11 (1.10-4.07)*              | 1.92 (0.99-3.74)               |
| <b>Education</b>                             |                                |                                |                                |
| University and above (ref)                   | 1.00                           | 1.00                           | 1.00                           |
| Junior college                               | 0.95 (0.57-1.59)               | 0.91 (0.53-1.54)               | 0.86 (0.50-1.48)               |
| High school/ Technical secondary school      | 1.31 (0.79-2.17)               | 1.30 (0.77-2.18)               | 1.26 (0.74-2.13)               |
| Junior high school                           | 0.88 (0.45-1.72)               | 0.83 (0.42-1.66)               | 0.75 (0.38-1.52)               |
| <b>Marital status</b>                        |                                |                                |                                |
| Unmarried/Divorced/ Widowed (ref)            | 1.00                           | 1.00                           | 1.00                           |
| Married                                      | 0.85 (0.53-1.37)               | 0.85 (0.52-1.39)               | 0.83 (0.50-1.37)               |
| <b>Personal monthly income (RMB)</b>         |                                |                                |                                |
| ≥10000 (ref)                                 | 1.00                           | 1.00                           | 1.00                           |
| 5000-9999                                    | 1.26(0.70-2.27)                | 1.25 (0.68-2.30)               | 1.29 (0.70-2.41)               |
| 2000-4999                                    | 1.45 (0.78-2.69)               | 1.39 (0.74-2.64)               | 1.43 (0.75-2.74)               |
| <2000                                        | 0.94 (0.41-2.15)               | 0.86 (0.37-2.02)               | 1.01 (0.42-2.41)               |
| <b>Area</b>                                  |                                |                                |                                |
| Within the inner ring (ref)                  | 1.00                           | 1.00                           | 1.00                           |
| Between the inner and middle ring            | 0.52 (0.29-0.93)*              | 0.45 (0.25-0.84)*              | 0.44 (0.24-0.82)**             |
| Between the middle and outer ring            | 0.92 (0.56-1.51)               | 0.78 (0.46-1.31)               | 0.72 (0.43-1.23)               |
| Beyond the outer ring                        | 0.69 (0.42-1.15)               | 0.59 (0.33-1.05)               | 0.56 (0.31-1.01)               |
| <b>Ownership of motor vehicle</b>            |                                |                                |                                |
| No (ref)                                     | 1.00                           | 1.00                           | 1.00                           |
| Yes                                          | 1.37 (0.95-1.98)               | 1.45 (0.99-2.12)               | 1.53 (1.04-2.25)*              |
| <b>Ownership of bicycle</b>                  |                                |                                |                                |
| No (ref)                                     | 1.00                           | 1.00                           | 1.00                           |
| Yes                                          | 0.85 (0.54-1.33)               | 0.84 (0.53-1.35)               | 0.92 (0.57-1.48)               |
| <b>Distance from work/college/university</b> |                                |                                |                                |
| ≤1.5km (ref)                                 | 1.00                           | 1.00                           | 1.00                           |
| 1.5-5km                                      | 1.28 (0.73-2.24)               | 1.27 (0.71-2.27)               | 1.33 (0.73-2.39)               |

|                                                                   |                   |                    |                    |
|-------------------------------------------------------------------|-------------------|--------------------|--------------------|
| >5km                                                              | 2.04 (1.07-3.90)* | 2.22 (1.13-4.33)*  | 2.58 (1.30-5.12)** |
| <b>Commuting time (one way)</b>                                   |                   |                    |                    |
| ≤15min (ref)                                                      | 1.00              | 1.00               | 1.00               |
| 15-30min                                                          | 0.96 (0.57-1.61)  | 0.97 (0.57-1.65)   | 0.93 (0.54-1.60)   |
| >30min                                                            | 0.84 (0.45-1.58)  | 0.91 (0.48-1.73)   | 0.83 (0.43-1.62)   |
| <b>Perceived bikeability</b>                                      |                   |                    |                    |
| Presence of dedicated bicycle lane                                |                   | 1.38 (1.12-1.68)** | 1.37 (1.12-1.68)** |
| Access to a public transportation stop/station                    |                   | 0.83 (0.68-1.01)   | 0.82 (0.67-0.99)*  |
| Access to destinations                                            |                   | 0.85 (0.66-1.10)   | 0.81 (0.63-1.06)   |
| Physical condition of bicycle lanes                               |                   | 1.19 (0.89-1.59)   | 1.15 (0.85-1.54)   |
| Maintenance of lanes                                              |                   | 0.81 (0.60-1.08)   | 0.82 (0.61-1.11)   |
| Vegetation/shades along the bicycle lanes                         |                   | 1.29 (0.97-1.71)   | 1.23 (0.91,1.65)   |
| Traffic violation as a barrier                                    |                   | 1.01 (0.79-1.29)   | 1.01 (0.79-1.29)   |
| Traffic volume as a barrier                                       |                   | 1.14 (0.87-1.49)   | 1.18 (0.90-1.56)   |
| Motor bikes/electronic scooters as barriers                       |                   | 0.99 (0.76-1.29)   | 0.96 (0.74-1.26)   |
| <b>Social norms</b>                                               |                   |                    |                    |
| Riding mobile shared bicycles perceived as fashionable            |                   |                    | 1.46 (1.21-1.76)** |
| Riding mobile shared bicycles represents low socioeconomic status |                   |                    | 0.91 (0.76-1.08)   |

Model 1 included only demographic variables. Model 2 included perceived environmental and demographic variables. Model 3 included all variables. \* $p < 0.05$ , \*\* $p < 0.01$

## DISCUSSION

Over the last 30 years, China has witnessed rapid economic development and a booming car industry and consequentially, a dramatic decrease in cycling.<sup>12-14</sup> This is the first community-based study to evaluate the effect of new dock-less mobile PBSPs on cycling for transport. We found that the proportion of participants that cycled for transport increased significantly from 33.3% to 48.3% after the advent of mobile PBSPs.



1  
2  
3 Nearly 30% of the participants who usually travelled by car/motorcycles/electric  
4 motorcycles adopted cycling after the launch. In comparison, a study that evaluated  
5 conventional PBSPs with docking stations showed that in Beijing, Shanghai and  
6 Hangzhou, 5.2%, 0.46% and 4% of car trips were replaced by bicycle.<sup>32</sup> Studies about  
7 PBSPs with docking stations in Barcelona, London, Montreal and Washington, DC  
8 have all reported low transfer rates from car journeys to shared bicycles.<sup>18,33</sup> It appears  
9 that dock-less mobile PBSPs might have the potential to be more effective and to have  
10 a wider reach in promoting cycling than conventional PBSPs.<sup>20,34</sup> However, it is  
11 important to take into account that the effect sizes are not comparable because our  
12 study used individual-level data and previous evaluations used trip-level data. We  
13 offer several potential explanations for the potentially more effective dock-less mobile  
14 PBSPs as follows. Firstly, the large number of bicycles in circulation and the GPS  
15 positioning function allow for better access to bicycles. Secondly, conventional  
16 PBSPs in China require local “HuKou” (a permanent residency system unique to  
17 China) and are therefore not available to visitors and temporary residents. Instead,  
18 mobile PBSPs are available to all who have registered an account online. Thirdly, a  
19 fully dockless system makes it convenient for users to pick up and drop off bicycles.  
20 Lastly, mobile payment is instantaneous and convenient. However, it is important to  
21 note that a prerequisite for successful mobile PBSPs is the ubiquity of mobile  
22 payment, as is the case in China.<sup>35</sup>

23  
24  
25  
26  
27  
28  
29  
30  
31  
32  
33  
34  
35  
36  
37  
38  
39  
40  
41  
42  
43  
44  
45  
46 Based on our preliminary evidence, one may conclude that mobile PBSPs have great  
47 potential for cycling promotion in China. Perhaps a key ingredient for the success of  
48 mobile PBSPs in Shanghai is China’s history of cycling as a social norm.<sup>36</sup> Another  
49 reason for the success of mobile PBSPs is that they have been created and promoted  
50 by the private sector which has vested interest in the wide adoption of shared bicycles.  
51  
52  
53  
54  
55  
56  
57  
58  
59  
60

1  
2  
3 Business competition stimulates continuous development and improvement of  
4 bicycle-sharing technology and promoting of cycling at the population level.<sup>37</sup>  
5  
6  
7 We further explored the correlates of adopting commuting cycling in the context of  
8  
9 the new mobile PBSPs. We found that younger participants were more likely to adopt  
10  
11 cycling, which is consistent with previous studies.<sup>38-40</sup> We found that gender and  
12  
13 education were not related to adopting cycling, which was consistent with a study  
14  
15 conducted in Beijing, but different to results from other studies from the United States,  
16  
17 Spain, and UK which found that males and those with higher education were more  
18  
19 likely to cycle.<sup>27,39-41</sup> Previous evidence on the associations between income and  
20  
21 cycling was mixed, and our findings suggested that there was no association between  
22  
23 income and change in travel mode.<sup>26,27,39,42</sup> It is noteworthy that we found positive  
24  
25 associations of commuting distance and car ownership with adopting cycling, which  
26  
27 is counter-intuitive and different from previous findings.<sup>39-41,43</sup> A potential  
28  
29 explanation is that those who lived within walking distance (<1.5 km) to  
30  
31 work/college/university may not own a car or consider cycling, so bicycle-sharing  
32  
33 was most likely to affect those who lived relatively far away from  
34  
35 work/college/university and previously traveled by car because they could not easily  
36  
37 access public transportation stops/stations without shared bicycles.  
38  
39  
40  
41 Among the perceived bikeability of the environment, presence of dedicated bicycle  
42  
43 lanes were positively associated with change in travel mode which is in line with  
44  
45 several other studies, including some from Beijing.<sup>26,39,43-47</sup> Among them, a study in  
46  
47 India suggested that dedicated bicycle lanes were the most important attribute of  
48  
49 bicycle infrastructure.<sup>45</sup> A study from Beijing found that the perception that bicycle  
50  
51 lanes have gradually been taken over by motorized vehicles is a key deterrent for  
52  
53 people to switch to cycling.<sup>39</sup> On the other hand, consistent with other studies, we  
54  
55  
56  
57  
58  
59  
60

1  
2  
3 found an inverse association between access to a public transportation stop/station and  
4 adopting cycling.<sup>28,40,47</sup> Unlike some previous studies, we did not find an association  
5  
6 between other aspects of the bikeability of the environment, such as traffic safety and  
7  
8 aesthetics, with adopting cycling.<sup>26,38,41,43,44</sup>  
9  
10  
11 Another finding from our study is that about social norms. Although previous studies  
12  
13 have found effects of attitudes towards cycling and other modes of transportation on  
14  
15 mode choice, our study examined effects of both positive and negative attitudes  
16  
17 toward cycling.<sup>48-51</sup> Our data showed that the perception that riding mobile shared  
18  
19 bicycles is fashionable was positively correlated with adopting cycling while  
20  
21 considering riding mobile shared bicycles representing low income was inversely  
22  
23 correlated with switching to cycling. This finding highlights that promoting positive  
24  
25 social norms may be critical to increasing cycling at the population level.  
26  
27  
28  
29  
30

### 31 **Limitations**

32  
33 There are some limitations to this study. First, all measures were based on self-reports,  
34  
35 however, the measures have been validated [31]. Second, this study applied a  
36  
37 retrospective design, due to practical reasons outlined earlier. This limits causal  
38  
39 inference from the current study. Third, because we did not collect total physical  
40  
41 activity levels at two time points, we could not determine whether those who have  
42  
43 adopted cycling have become more physically active overall. Therefore, our study  
44  
45 could not verify whether the significant change from inactive transport modes to  
46  
47 cycling has increased physical activity at the population level.  
48  
49  
50  
51

### 52 **CONCLUSION**

53  
54 We found that mobile bicycle-sharing can be effective in increasing bicycle use and  
55  
56  
57  
58  
59  
60

1  
2  
3 might have the potential to be scaled up internationally. To maximize the impact of  
4  
5 mobile PBSPs at the population level, improvement to attributes of the built  
6  
7 environments, such as dedicated bicycle lanes, and promoting positive social norms  
8  
9 about cycling should be considered.  
10

### 11 12 13 **Acknowledgements**

14  
15 We would like to express our sincere thanks to the officials from 12 neighborhoods  
16  
17 who provided assistance during the field investigation.  
18  
19

### 20 21 22 **Contributors**

23  
24 YJ and HF conceived the idea, analyzed the data and drafted the paper. DD, KG, LC,  
25  
26 SZ, and ZM contributed to the writing and assisted with the analysis and  
27  
28 interpretation. YJ, LC, SZ, and ZM contributed to collect data. All authors have read  
29  
30 and approved the final manuscript.  
31  
32

### 33 34 35 **Funding**

36  
37 The work was supported by the Shanghai Municipal Commission of Health and  
38  
39 Family Planning (Grant No. 15GWZK1001 & 2013SY006). The funders had no role  
40  
41 in study design, data collection and analysis, decision to publish, or preparation of the  
42  
43 manuscript.  
44  
45

### 46 47 48 **Competing interests**

49  
50 The authors declare that they have no competing interests.  
51  
52

### 53 54 55 **Abbreviations**

1  
2  
3 PA: Physical activity; PBSP: Public bicycle-sharing program; GPS: Global  
4 Positioning System; CWES: Chinese Walkable Environment Scale; SPSS:  
5 Statistical Package for Social Sciences.  
6  
7  
8  
9  
10

### 11 **Availability of data and material**

12  
13 Please contact authors for data requests.  
14  
15  
16  
17  
18  
19  
20  
21  
22  
23  
24  
25  
26  
27  
28  
29  
30  
31  
32  
33  
34  
35  
36  
37  
38  
39  
40  
41  
42  
43  
44  
45  
46  
47  
48  
49  
50  
51  
52  
53  
54  
55  
56  
57  
58  
59  
60

## REFERENCES

1. 2018 Physical Activity Guidelines Advisory Committee. 2018 Physical Activity Guidelines Advisory Committee Scientific Report. Washington, DC: U.S. Department of Health and Human Services 2018.
2. Althoff T, Sosic R, Hicks JL, *et al.* Large-scale physical activity data reveal worldwide activity inequality. *Nature* 2017;547(7663):336-9.
3. Hallal, PC, Andersen LB, Bull FC, , *et al.* Global physical activity levels: surveillance progress, pitfalls, and prospects. *Lancet* 2012;380(9838):247-57.
4. Lee IM, Shiroma EJ, Lobelo F, *et al.* Effect of physical inactivity on major non-communicable diseases worldwide: an analysis of burden of disease and life expectancy. *Lancet* 2012;380(9838):219-29.
5. Ding D, Lawson KD, Kolbe-Alexander TL, *et al.* The economic burden of physical inactivity: a global analysis of major non-communicable diseases. *Lancet* 2016;388(10051):1311-24.
6. Berrigan D, Troiano RP, McNeel T, *et al.* Active transportation increases adherence to activity recommendations. *Am J Prev Med* 2006;31(3):210-6.
7. Donaire-Gonzalez D, de Nazelle A, Cole-Hunter T, *et al.* The Added Benefit of Bicycle Commuting on the Regular Amount of Physical Activity Performed. *Am J Prev Med* 2015;49(6):842-9.
8. Kelly P, Kahlmeier S, Goetschi T, *et al.* Systematic review and meta-analysis of reduction in all-cause mortality from walking and cycling and shape of dose response relationship. *Int J Behav Nutr Phys Act* 2014;11(132).
9. Oja P, Titze S, Bauman A, *et al.* Health benefits of cycling: a systematic review. *Scand J Med Sci Sports* 2011;21(4):496-509.
10. Saunders LE, Green JM, Petticrew MP, *et al.* What Are the Health Benefits of

- 1  
2  
3 Active Travel? A Systematic Review of Trials and Cohort Studies. *PLoS One*  
4  
5 2013;8(e699128).  
6  
7 11. Celis-Morales CA, Lyall DM, Welsh P, *et al.* Association between active  
8  
9 commuting and incident cardiovascular disease, cancer, and mortality: prospective  
10  
11 cohort study. *BMJ* 2017;357:(j1456).  
12  
13 12. Christensen, H.R. Is the Kingdom of Bicycles Rising Again? Cycling, Gender,  
14  
15 and Class in Postsocialist China. *Transfers: Interdisciplinary Journal of Mobility*  
16  
17 *Studies* 2017;7(2):1-20.  
18  
19 13. Tang Yang, Liu Weiwei, Pan Haixiao. The impact of urban policy on the  
20  
21 development of bicycles and cycling in Shanghai, in Urban and rural governance and  
22  
23 planning reform -- 2014 annual meeting of China's urban planning: Haikou, Hainan,  
24  
25 China.  
26  
27 14. Gong Weiyan, Feng Ganyu, Yuan Fan, *et al.* Analysis on the changing trends of  
28  
29 transportation modes and time among Chinese non-agricultural professional  
30  
31 population in 2002 and 2010-2012. *Acta Nutrimenta Sinica* 2017;4:327-31.  
32  
33 15. Zhang Y, Thomas T, Brussel MJG, *et al.* Expanding Bicycle-Sharing Systems:  
34  
35 Lessons Learnt from an Analysis of Usage. *PLoS One* 2016;11(e016860412).  
36  
37 16. DeMaio P. Bike-sharing: History, Impacts, Models of Provision, and Future.  
38  
39 *Journal of Public Transportation* 2014;12(4).  
40  
41 17. Shaheen, SA, Guzman S, Zhang H. Bikesharing in Europe, the Americas, and  
42  
43 Asia: Past, present, and future. *Transportation Research Record*  
44  
45 2010;(2143):159-67.  
46  
47 18. Fishman E, Washington S, Haworth N. Bike share: A synthesis of the literature.  
48  
49 *Transp Rev* 2013;33(2):148-65.  
50  
51 19. Liu Qilu. Study on the behavioral influencing factors of the choice of the public  
52  
53  
54  
55  
56  
57  
58  
59  
60

- bicycle users in Jinhua. *Business* 2016;(16):62-3.
20. Feng Xuemin. Analysis on the current situation and countermeasures of the use of public bicycles in Xi'an. *China Market* 2016;(32):180-1.
21. Lin Jun. Mobile bicycle-sharing: the new favorite travel mode. Sina website. <http://finance.sina.com.cn/roll/2016-12-06/doc-ifxyiayq2548321.shtml>. Accessed 12 Dec 2017.
22. Ministry of Transport of the People's Republic of China: A total of 10 million mobile shared bicycles had been deployed in China and overdose in some areas. Cankaoxiaoxi website. <http://www.cankaoxiaoxi.com/china/20170523/2030603.shtml>. Accessed 25 Sep 2017.
23. Yu Xiao. Additional shared bicycles are banned in Shanghai; there are over 1.5 million mobile shared bicycles. Guangming website. [http://politics.gmw.cn/2017-08/20/content\\_25733044.htm](http://politics.gmw.cn/2017-08/20/content_25733044.htm). Accessed 26 Sep 2017.
24. Mobike. Bike-sharing and the city - 2017 White Paper. Shanghai: Mobike, 2017. [https://mobike.com/global/public/Mobike%20-%20White%20Paper%202017\\_EN.pdf](https://mobike.com/global/public/Mobike%20-%20White%20Paper%202017_EN.pdf). Accessed 9 Mar 2018.
25. Sallis JF, Owen N. Ecological models of health behavior. In: Glanz K, Rimer BK, Viswanath K, editors. *Health behavior and health education: Theory, research and practice* (4th ed.). San Francisco: Jossey-Bass; 2015. p. 43-64.
26. Pucher J, Buehler R. Why Canadians cycle more than Americans: A comparative analysis of bicycling trends and policies. *Transport Policy* 2006;13(3):265-79.
27. Zahran S, Brody SD, Maghelal P, *et al.* Cycling and walking: Explaining the spatial distribution of healthy modes of transportation in the United States. *Transportation Research part D-Transport and Environment* 2008;13(7):462-70.



- 1  
2  
3 28. Braun LM, Rodriguez DA, Cole-Hunter T, *et al.* Short-term planning and policy  
4 interventions to promote cycling in urban centers: Findings from a commute mode  
5 choice analysis in Barcelona, Spain. *Transportation Research part A-Policy and*  
6 *Practice* 2016;89:164-83.  
7  
8  
9  
10  
11 29. Gao Rui. There are more than 1 million mobile shared bicycles and more than 13  
12 million registered users in Shanghai. Eastday website.  
13  
14 <http://sh.eastday.com/m/20170614/u1a13043063.html>. Accessed 26 May 2017.  
15  
16  
17  
18 30. Wahlgren L, Stigell E, Schantz P. The active commuting route environment  
19 scale (ACRES): development and evaluation. *Int J Behav Nutr Phys Act* 2010;7(58).  
20  
21  
22 31. Zhou R, Fu H, Luo J, *et al.* Evaluation on reliability and validity of Chinese  
23 Walkable Environment Scale for urban community residents. *Chinese Journal of*  
24 *Public Health* 2011;(07):841-3.  
25  
26  
27  
28  
29 32. Yang T, Haixiao P, Qing S. Bike-sharing Systems in Beijing, Shanghai and  
30 Hangzhou and their Impact on Travel Behaviour, in Transportation Research Board  
31 Annual Meeting 2011, Washington, DC.  
32  
33  
34  
35 33. Fuller D, Gauvin L, Kestens Y, *et al.* The potential modal shift and health  
36 benefits of implementing a public bicycle share program in Montreal, Canada. *Int J*  
37 *Behav Nutr Phys Act* 2013;10(66).  
38  
39  
40  
41 34. Zhu Wei, Pang Yuqi, Wang De, *et al.* Travel Behavior Change after the  
42 Introduction of Public Bicycle Systems: A Case Study of Minhang District,  
43 Shanghai. *Urban Planning Forum* 2012;(05):76-81.  
44  
45  
46  
47  
48 35. China Internet Network Information Center. China's 39th statistical report on  
49 internet development. In: official statistics for internet development 2016.  
50  
51 <http://cnnic.cn/hlwfzyj/hlwxzbg/hlwtjbg/201701/P020170123364672657408.pdf>.  
52  
53  
54 Accessed 15 Jan 2017.  
55  
56  
57  
58  
59  
60

- 1  
2  
3 36. Guan Hongyi. A study on urban bicycle transportation system. Southwest  
4 Transportation University. 2004; 9.  
5  
6  
7 37. Li Kunhao. A study on the development of urban mobile bicycle-sharing based  
8 on shared economy. *City* 2017;(03):66-9.  
9  
10  
11 38. Rietveld P, Daniel V. Determinants of bicycle use: do municipal policies matter?  
12 *Transportation Research part A-Policy and Practice* 2004;38(7):531-50.  
13  
14 39. Yang M, Zacharias J. Potential for revival of the bicycle in Beijing. *International*  
15 *Journal of Sustainable Transportation* 2016;10(6):517-27.  
16  
17 40. Cole-Hunter T, Donaire-Gonzalez D, Curto A, *et al.* Objective correlates and  
18 determinants of bicycle commuting propensity in an urban environment.  
19 *Transportation Research part D-Transport and Environment* 2015;40:132-43.  
20  
21 41. Parkin J, Wardman M, Page M. Estimation of the determinants of bicycle mode  
22 share for the journey to work using census data. *Transportation* 2008;35(1):93-109.  
23  
24 42. Lin, D, Allan A, Cui J. Exploring Differences in Commuting Behaviour among  
25 Various Income Groups during Polycentric Urban Development in China: New  
26 Evidence and Its Implications. *Sustainability* 2016;8(118811).  
27  
28 43. Buehler R, Pucher J. Cycling to work in 90 large American cities: new evidence  
29 on the role of bike paths and lanes. *Transportation* 2012;39(2):409-32.  
30  
31 44. Wahlgren L, Schantz P. Exploring Bikeability in a Suburban Metropolitan Area  
32 Using the Active Commuting Route Environment Scale (ACRES). *International*  
33 *Journal of Environmental Research and Public Health* 2014;11(8):8276-8300.  
34  
35 45. Basu S ,Vasudevan V. Effect of bicycle friendly roadway infrastructure on  
36 bicycling activities in urban India, in *Procedia Social and Behavioral Sciences*.  
37 Chakroborty P, Reddy HK, Amekudzi A, editors. 2013;104:1139-1148.  
38  
39 46. Burk D. Infrastructure, Social Practice, and Environmentalism: The Case of  
40  
41  
42  
43  
44  
45  
46  
47  
48  
49  
50  
51  
52  
53  
54  
55  
56  
57  
58  
59  
60

- 1  
2  
3 Bicycle-Commuting. *Social Forces* 2017;95(3):1209-36.  
4  
5 47. Zhao P. The Impact of the Built Environment on Bicycle Commuting: Evidence  
6  
7 from Beijing. *Urban Studies* 2014;51(5):1019-37.  
8  
9 48. Thigpen CG, Driller BK, Handy SL. Using a stages of change approach to  
10  
11 explore opportunities for increasing bicycle commuting. *Transportation Research*  
12  
13 *part D-Transport and Environment* 2015;39:44-55.  
14  
15 49. Schoner JE, Cao J, Levinson DM. Catalysts and magnets: Built environment and  
16  
17 bicycle commuting. *Journal of Transport Geography* 2015;47:100-8.  
18  
19 50. Willis DP, Manaugh K, El-Geneidy A. Cycling under influence: Summarizing  
20  
21 the influence of perceptions, attitudes, habits, and social environments on cycling for  
22  
23 transportation. *International Journal of Sustainable Transportation*  
24  
25 2015;9(8):565-79.  
26  
27  
28 51. Okraszewska R. The Impact of Organizational Culture on Bicycle Commuting  
29  
30 Frequency: The Research Based on Example of Three IT companies, in Springer  
31  
32 Proceedings in Business and Economics. M. Bak, Editors. 2016. p.201-10.  
33  
34  
35  
36  
37  
38  
39  
40  
41  
42  
43  
44  
45  
46  
47  
48  
49  
50  
51  
52  
53  
54  
55  
56  
57  
58  
59  
60

1  
2  
3 **Figure 1. Consort flow diagram for analysis**  
4  
5  
6  
7  
8  
9  
10  
11  
12  
13  
14  
15  
16  
17  
18  
19  
20  
21  
22  
23  
24  
25  
26  
27  
28  
29  
30  
31  
32  
33  
34  
35  
36  
37  
38  
39  
40  
41  
42  
43  
44  
45  
46  
47  
48  
49  
50  
51  
52  
53  
54  
55  
56  
57  
58  
59  
60

For peer review only

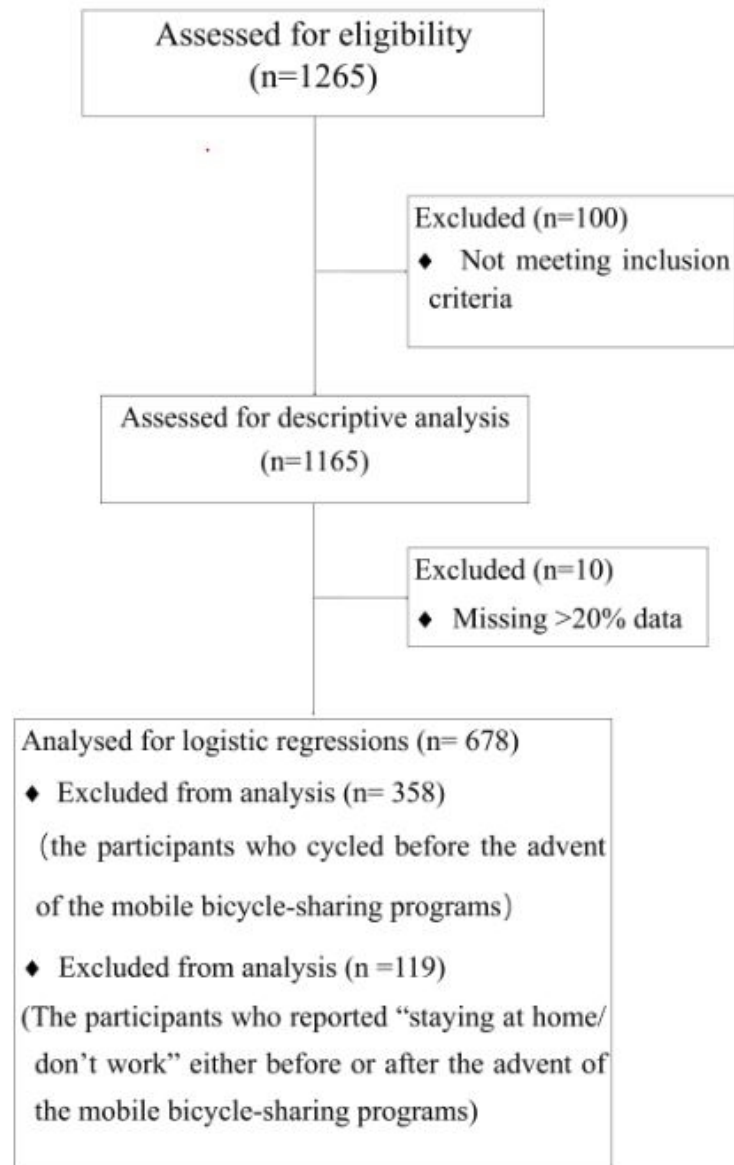

Figure 1. Consort flow diagram for analysis

133x179mm (96 x 96 DPI)

## Appendix 1

**Table 1. The questions measuring bikeable neighborhood environment.**

| Questions                                                                                          | Rating  |               |           |                 |         |
|----------------------------------------------------------------------------------------------------|---------|---------------|-----------|-----------------|---------|
|                                                                                                    | 1       | 2             | 3         | 4               | 5       |
| 1. Among the surrounding roads, how many dedicated bicycle lanes are set up?                       | none    | a few         | half      | most            | all     |
| 2. Distance from neighborhood to a public transportation stop/station (subway station/bus station) | >2km    | 1-2km         | 0.5- <1km | 0.2 km - <0.5km | <0.2km  |
| 3. Access to destinations such as supermarkets, pharmacy, and small market                         | poor    | a little poor | moderate  | good            | perfect |
| 4. Physical condition of bicycle lanes                                                             | poor    | a little poor | moderate  | good            | perfect |
| 5. Maintenance of lanes                                                                            | poor    | a little poor | moderate  | good            | perfect |
| 6. Vegetation/shade along bicycle lanes                                                            | poor    | a little poor | moderate  | good            | perfect |
| 7. Obstruction through traffic violation                                                           | serious | some          | moderate  | a little        | little  |
| 8. Obstruction through motor vehicles                                                              | serious | some          | moderate  | a little        | little  |
| 9. Obstruction through motorbikes / electric motorcycles                                           | serious | some          | moderate  | a little        | little  |

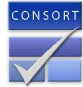

## CONSORT 2010 checklist of information to include when reporting a randomised trial\*

| Section/Topic                    | Item No | Checklist item                                                                                                                                                                              | Reported on page No |
|----------------------------------|---------|---------------------------------------------------------------------------------------------------------------------------------------------------------------------------------------------|---------------------|
| <b>Title and abstract</b>        |         |                                                                                                                                                                                             |                     |
|                                  | 1a      | Identification as a randomised trial in the title                                                                                                                                           | 1                   |
|                                  | 1b      | Structured summary of trial design, methods, results, and conclusions (for specific guidance see CONSORT for abstracts)                                                                     | 3                   |
| <b>Introduction</b>              |         |                                                                                                                                                                                             |                     |
| Background and objectives        | 2a      | Scientific background and explanation of rationale                                                                                                                                          | 4,5                 |
|                                  | 2b      | Specific objectives or hypotheses                                                                                                                                                           | 5,6                 |
| <b>Methods</b>                   |         |                                                                                                                                                                                             |                     |
| Trial design                     | 3a      | Description of trial design (such as parallel, factorial) including allocation ratio                                                                                                        | 6                   |
|                                  | 3b      | Important changes to methods after trial commencement (such as eligibility criteria), with reasons                                                                                          | No                  |
| Participants                     | 4a      | Eligibility criteria for participants                                                                                                                                                       | 7                   |
|                                  | 4b      | Settings and locations where the data were collected                                                                                                                                        | 7                   |
| Interventions                    | 5       | The interventions for each group with sufficient details to allow replication, including how and when they were actually administered                                                       | 6                   |
| Outcomes                         | 6a      | Completely defined pre-specified primary and secondary outcome measures, including how and when they were assessed                                                                          | 7-9                 |
|                                  | 6b      | Any changes to trial outcomes after the trial commenced, with reasons                                                                                                                       | No                  |
| Sample size                      | 7a      | How sample size was determined                                                                                                                                                              | No                  |
|                                  | 7b      | When applicable, explanation of any interim analyses and stopping guidelines                                                                                                                | 9,10                |
| <b>Randomisation:</b>            |         |                                                                                                                                                                                             |                     |
| Sequence generation              | 8a      | Method used to generate the random allocation sequence                                                                                                                                      | No                  |
|                                  | 8b      | Type of randomisation; details of any restriction (such as blocking and block size)                                                                                                         | No                  |
| Allocation concealment mechanism | 9       | Mechanism used to implement the random allocation sequence (such as sequentially numbered containers), describing any steps taken to conceal the sequence until interventions were assigned | No                  |
| Implementation                   | 10      | Who generated the random allocation sequence, who enrolled participants, and who assigned participants to interventions                                                                     | No                  |
| Blinding                         | 11a     | If done, who was blinded after assignment to interventions (for example, participants, care providers, those                                                                                | No                  |

|                                                      |     |                                                                                                                                                   |       |
|------------------------------------------------------|-----|---------------------------------------------------------------------------------------------------------------------------------------------------|-------|
|                                                      |     | assessing outcomes) and how                                                                                                                       |       |
|                                                      | 11b | If relevant, description of the similarity of interventions                                                                                       | No    |
| Statistical methods                                  | 12a | Statistical methods used to compare groups for primary and secondary outcomes                                                                     | 9,10  |
|                                                      | 12b | Methods for additional analyses, such as subgroup analyses and adjusted analyses                                                                  | 9,10  |
| <b>Results</b>                                       |     |                                                                                                                                                   |       |
| Participant flow (a diagram is strongly recommended) | 13a | For each group, the numbers of participants who were randomly assigned, received intended treatment, and were analysed for the primary outcome    | 26    |
|                                                      | 13b | For each group, losses and exclusions after randomisation, together with reasons                                                                  | 26    |
| Recruitment                                          | 14a | Dates defining the periods of recruitment and follow-up                                                                                           | 7     |
|                                                      | 14b | Why the trial ended or was stopped                                                                                                                | No    |
| Baseline data                                        | 15  | A table showing baseline demographic and clinical characteristics for each group                                                                  | 11    |
| Numbers analysed                                     | 16  | For each group, number of participants (denominator) included in each analysis and whether the analysis was by original assigned groups           | 26    |
| Outcomes and estimation                              | 17a | For each primary and secondary outcome, results for each group, and the estimated effect size and its precision (such as 95% confidence interval) | 13,14 |
|                                                      | 17b | For binary outcomes, presentation of both absolute and relative effect sizes is recommended                                                       | 13,14 |
| Ancillary analyses                                   | 18  | Results of any other analyses performed, including subgroup analyses and adjusted analyses, distinguishing pre-specified from exploratory         | 13,14 |
| Harms                                                | 19  | All important harms or unintended effects in each group (for specific guidance see CONSORT for harms)                                             | No    |
| <b>Discussion</b>                                    |     |                                                                                                                                                   |       |
| Limitations                                          | 20  | Trial limitations, addressing sources of potential bias, imprecision, and, if relevant, multiplicity of analyses                                  | 17    |
| Generalisability                                     | 21  | Generalisability (external validity, applicability) of the trial findings                                                                         | 17    |
| Interpretation                                       | 22  | Interpretation consistent with results, balancing benefits and harms, and considering other relevant evidence                                     | 14-17 |
| <b>Other information</b>                             |     |                                                                                                                                                   |       |
| Registration                                         | 23  | Registration number and name of trial registry                                                                                                    | No    |
| Protocol                                             | 24  | Where the full trial protocol can be accessed, if available                                                                                       | No    |
| Funding                                              | 25  | Sources of funding and other support (such as supply of drugs), role of funders                                                                   | 18    |

\*We strongly recommend reading this statement in conjunction with the CONSORT 2010 Explanation and Elaboration for important clarifications on all the items. If relevant, we also recommend reading CONSORT extensions for cluster randomised trials, non-inferiority and equivalence trials, non-pharmacological treatments, herbal interventions, and pragmatic trials. Additional extensions are forthcoming: for those and for up to date references relevant to this checklist, see [www.consort-statement.org](http://www.consort-statement.org).



# BMJ Open

## Effects of new dock-less bicycle-sharing programs on cycling: a retrospective study in Shanghai

|                                 |                                                                                                                                                                                                                                                                                                                                                                                                                                                                                                                                                                                                                                                                                                                                                                                                                                                                                                                                                                                                                                                                                                                                                                                                          |
|---------------------------------|----------------------------------------------------------------------------------------------------------------------------------------------------------------------------------------------------------------------------------------------------------------------------------------------------------------------------------------------------------------------------------------------------------------------------------------------------------------------------------------------------------------------------------------------------------------------------------------------------------------------------------------------------------------------------------------------------------------------------------------------------------------------------------------------------------------------------------------------------------------------------------------------------------------------------------------------------------------------------------------------------------------------------------------------------------------------------------------------------------------------------------------------------------------------------------------------------------|
| Journal:                        | <i>BMJ Open</i>                                                                                                                                                                                                                                                                                                                                                                                                                                                                                                                                                                                                                                                                                                                                                                                                                                                                                                                                                                                                                                                                                                                                                                                          |
| Manuscript ID                   | bmjopen-2018-024280.R1                                                                                                                                                                                                                                                                                                                                                                                                                                                                                                                                                                                                                                                                                                                                                                                                                                                                                                                                                                                                                                                                                                                                                                                   |
| Article Type:                   | Research                                                                                                                                                                                                                                                                                                                                                                                                                                                                                                                                                                                                                                                                                                                                                                                                                                                                                                                                                                                                                                                                                                                                                                                                 |
| Date Submitted by the Author:   | 13-Oct-2018                                                                                                                                                                                                                                                                                                                                                                                                                                                                                                                                                                                                                                                                                                                                                                                                                                                                                                                                                                                                                                                                                                                                                                                              |
| Complete List of Authors:       | Jia, Yingnan; Fudan University, School of Public Health, Key Lab of Public Health Safety of the Ministry of Education; Fudan University, Health Communication Institute<br>Ding, Ding; The University of Sydney, Prevention Research Collaboration, Sydney School of Public Health; University of Sydney, The Charles Perkins Centre<br>Gebel, Klaus; University of Sydney, Prevention Research Collaboration, Sydney School of Public Health; Australian Catholic University, School of Allied Health<br>Chen, Lili; Fudan University, School of Public Health, Key Lab of Public Health Safety of the Ministry of Education; Fudan University, Health Communication Institute<br>Zhang, Sen; Fudan University, School of Public Health, Key Lab of Public Health Safety of the Ministry of Education; Fudan University, Health Communication Institute<br>Ma, Zhicong; Fudan University, School of Public Health, Key Lab of Public Health Safety of the Ministry of Education; Fudan University, Health Communication Institute<br>Fu, Hua; Fudan University, School of Public Health, Key Lab of Public Health Safety of the Ministry of Education; Fudan University, Health Communication Institute |
| <b>Primary Subject Heading</b>: | Sports and exercise medicine                                                                                                                                                                                                                                                                                                                                                                                                                                                                                                                                                                                                                                                                                                                                                                                                                                                                                                                                                                                                                                                                                                                                                                             |
| Secondary Subject Heading:      | Sports and exercise medicine                                                                                                                                                                                                                                                                                                                                                                                                                                                                                                                                                                                                                                                                                                                                                                                                                                                                                                                                                                                                                                                                                                                                                                             |
| Keywords:                       | bicycle-sharing, cycling, travel mode, active travel, built environment, social norms                                                                                                                                                                                                                                                                                                                                                                                                                                                                                                                                                                                                                                                                                                                                                                                                                                                                                                                                                                                                                                                                                                                    |
|                                 |                                                                                                                                                                                                                                                                                                                                                                                                                                                                                                                                                                                                                                                                                                                                                                                                                                                                                                                                                                                                                                                                                                                                                                                                          |

SCHOLARONE™  
Manuscripts

**Title:** Effects of new dock-less bicycle-sharing programs on cycling: a retrospective study in Shanghai

**Author names:** Yingnan Jia<sup>1,2</sup>, Ding Ding<sup>3,4\*</sup>, Klaus Gebel<sup>3,5,6</sup>, Lili Chen<sup>1,2</sup>, Sen Zhang<sup>1,2</sup>, Zhicong Ma<sup>1,2</sup>, and Hua Fu<sup>1,2\*</sup>

**Affiliations:**

1 School of Public Health, Key Lab of Public Health Safety of the Ministry of Education, Fudan University, Shanghai 200032, China

2 Health Communication Institute, Fudan University, Shanghai 200032, China

3 Prevention Research Collaboration, Sydney School of Public Health, University of Sydney, Camperdown, New South Wales, Australia

4 The Charles Perkins Centre, University of Sydney, Camperdown, New South Wales, Australia

5 School of Allied Health, Australian Catholic University, North Sydney, New South Wales, Australia

6 Centre for Chronic Disease Prevention, School of Public Health, Tropical Medicine and Rehabilitation Sciences, James Cook University, Smithfield, Queensland, Australia

**Email:** Yingnan Jia: [jyn@fudan.edu.cn](mailto:jyn@fudan.edu.cn); Ding Ding: [melody.ding@sydney.edu.au](mailto:melody.ding@sydney.edu.au); Klaus Gebel: [klaus.gebel@acu.edu.au](mailto:klaus.gebel@acu.edu.au); Lili Chen: [16211020043@fudan.edu.cn](mailto:16211020043@fudan.edu.cn); Sen Zhang: [12307120117@fudan.edu.cn](mailto:12307120117@fudan.edu.cn); Zhicong Ma: [mazc14@fudan.edu.cn](mailto:mazc14@fudan.edu.cn); Hua Fu: [hfu@fudan.edu.cn](mailto:hfu@fudan.edu.cn).

**\*Corresponding author information:**

Address correspondence to: Hua Fu, PO Box 248, 138 Yixueyuan Road, Shanghai 200032, China. Tel: 86-21-54237327. E-mail: [hfu@fudan.edu.cn](mailto:hfu@fudan.edu.cn)

Address correspondence to: Ding Ding, Level 6, The Charles Perkins Centre (D17), the  
University of Sydney, NSW, Australia, 2006; Tel +61 2 8627 1842; Fax +61 2 9036 3184;

E-mail: [melody.ding@sydney.edu.au](mailto:melody.ding@sydney.edu.au)

Word count: 3264

For peer review only

## Abstract

**Objectives** To examine 1) the effect of new dock-less bicycle-sharing programs on change in travel mode and 2) the correlates of change in travel mode.

**Design** A retrospective natural experimental study

**Setting** 12 neighborhoods in Shanghai.

**Participants** 1265 respondents were recruited for a retrospective study in May 2017.

**Main outcome measures** Prevalence of cycling before and after launch of dockless bicycle sharing program.

**Results** The proportion of participants cycling for transport increased from 33.3% prior to the launch of the bicycle-sharing programs to 48.3% one year after the launch ( $p<0.001$ ). Being in the age group of 30-49 years (OR=2.28; 95%CI: 1.30-4.00), living within the inner ring of the city (OR=2.27; 95%CI: 1.22-4.26), having dedicated bicycle lanes (OR=1.37, 95% CI 1.12-1.68) and perceiving riding shared bicycles as fashionable (OR=1.46, 95% CI 1.21-1.76) were positively associated with adopting cycling for transport. Access to a public transportation stop/station (OR=0.82, 95% CI 0.67-0.99) was inversely correlated with adopting cycling for transport.

**Conclusions** Dock-less bicycle-sharing may promote bicycle use in a metropolitan setting. Findings from this study also highlight the importance of cycling-friendly built environments and cultural norms as facilitators of adopting cycling.

**Keywords:** bicycle-sharing; cycling; travel mode; active travel; built environment; social norms

### Strengths and limitations of this study

- An ecological framework can guide inquiry into a more comprehensive understanding of the factors that influence cycling behaviors.
- This study is the first to quantitatively evaluate whether the introduction of dock-less bicycle-sharing programs leads to more cycling.
- All measures were based on self-reports.
- This study applied a retrospective design, due to practical reasons outlined earlier. This limits causal inference from the current study.
- It could not verify whether the significant change from inactive transport modes to cycling has increased physical activity at the population level.

### Introduction

Regular physical activity (PA) reduces the risk of major chronic diseases and premature mortality.<sup>1</sup> However, around the world large proportions of the population are not sufficiently active or completely inactive which has significant health and economic consequences.<sup>2-5</sup> Active transportation by cycling has the potential to contribute considerably to overall activity levels of adults and is associated with significant health benefits.<sup>6-11</sup> Moreover, greater use of bicycles for day-to-day travel provides wider benefits, including reductions in carbon emissions, air pollution, and traffic congestion.<sup>10,12</sup> In Chinese cities, cycling used to be a conventional mode of travel for most people, to the point that the country was once referred to as the “Kingdom of Bicycles”.<sup>12</sup> However, since the turn of the century, Chinese cities have become

1  
2  
3 increasingly cycling-unfriendly due to increasing car ownership and car-oriented urban  
4  
5  
6 planning policies such as the conversion of non-motorized to motorized lanes and  
7  
8 banning non-motorized vehicles from arterial roads in some cities.<sup>13</sup> With the economic  
9  
10 development and booming car industry, between 2002 and 2010-2012, the proportion of  
11  
12 people using motorized transport as the main mode of transportation increased from  
13  
14 33.5% to 61.9%, while the proportion traveling by bicycle and walking decreased from  
15  
16 35.8% and 30.7% to 15.6% and 22.5%, respectively.<sup>14</sup>

17  
18  
19 As a strategy for promoting cycling and sustainable transportation overall, public bicycle-  
20  
21 sharing programs (PBSP) have been introduced in many cities around the world to  
22  
23 provide bicycles as a mode of transportation for relatively short trips and to bridge “the  
24  
25 last mile” of public transport services.<sup>15,16</sup> These PBSPs usually have docking stations  
26  
27 where users obtain and return the rental bicycles.<sup>17</sup> Although some studies have shown  
28  
29 that cycling has increased in some cities since the introduction of PBSPs, such as  
30  
31 Washington DC, Dublin, Beijing and Hangzhou, China, there are still some common  
32  
33 problems and challenges for conventional PBSPs, which may have limited their reach  
34  
35 and usage at a population level, such as reliance on docking stations, inconvenience in  
36  
37 payment and insufficient supply of shared bicycles.<sup>15,18-20</sup>

38  
39  
40 With the increasing popularity of smart phone payments, Global Positioning System  
41  
42 (GPS) tracking and other technology, dock-less bicycle-sharing provides new  
43  
44 opportunities for promoting active travel and physical activity.<sup>21</sup> Dock-less PBSPs utilize  
45  
46 mobile-controlled wheel lock and GPS tracking, so that users can locate the nearest  
47  
48 bicycle, unlock and lock the bicycle, and pay (usually, around 1RMB~0.15 USD per half  
49  
50 hour) through a mobile app. Moreover, some of the shared bicycles (e.g., Mobike) have  
51  
52  
53  
54  
55  
56  
57  
58  
59  
60

1  
2  
3 solid tires, which are durable and low-maintenance. Dock-less PBSPs are currently  
4  
5 deployed in many cities in China such as Shanghai, Beijing, and Guangzhou.<sup>22</sup> As of  
6  
7 May 2017, a total of 10 million dock-less shared bicycles had been deployed in China,  
8  
9 1.5 million of which in Shanghai, which even led the government to ban additional  
10  
11 shared bicycles.<sup>23,24</sup> Despite the rapid growth in dock-less PBSPs, there is very limited  
12  
13 evidence on whether dock-less PBSPs can change travel modes at the population level.<sup>25</sup>  
14  
15 Furthermore, the introduction of bicycle-sharing schemes alone may not lead to  
16  
17 population-level uptake, as various other factors may need to be present to facilitate  
18  
19 population level cycling. In line with social-ecological models, previous research  
20  
21 suggests that population-level cycling behavior is associated with a range of individual-  
22  
23 and environmental-level characteristics.<sup>26-29</sup> However, these socio-ecological correlates  
24  
25 have rarely been examined in evaluations of PBSPs and remain important research gaps.  
26  
27 Therefore, this study aims to 1) evaluate whether the introduction of dock-less PBSPs  
28  
29 leads to more cycling, and 2) to examine correlates of initiation of cycling, including  
30  
31 sociodemographic characteristics and aspects of the built and social environment.  
32  
33  
34  
35  
36  
37  
38  
39

## 40 **MATERIALS AND METHODS**

### 41 **Patient and Public Involvement**

42  
43 A retrospective study was conducted in May 2017. An intercept convenience sample  
44  
45 survey was conducted among residents from 12 neighborhoods. Upon approaching  
46  
47 potential participants, information about the study was provided and written informed  
48  
49 consent was obtained before participating in the study. This study received approval from  
50  
51 the ethics committee of the School of Public Health of Fudan University, China  
52  
53  
54  
55  
56  
57  
58  
59  
60

(IRB00002408 & FWA0002399). Participants have the right to find out the results of the study by contacting the member of the project.

### **Intervention**

Dock-less bicycle-sharing systems can be considered as a city-level intervention for travel mode. The system was officially launched in Shanghai in April 2016. By July 2017, there were more than 13 million registered users and more than 1 million dock-less shared bicycles in Shanghai.<sup>30</sup> The development of dock-less shared bicycles was so rapid in China that it limited opportunities for prospective data collection or inclusion of a control city that is comparable to Shanghai, but without a bicycle-sharing system. Therefore, a retrospective study design was used.

### **Study areas and recruitment of participants**

To explore the correlates of travel mode, a two-stage sampling method was employed. First, based on the Shanghai Transportation Map, the city was divided into four areas: within the inner ring, between the inner and middle rings, between the middle and outer rings, and beyond the outer ring. Then, three neighborhoods were selected in each of the four areas of Shanghai by purposive sampling. The selection criteria for neighborhoods were as follows: (1) within 1-2 km distance from the nearest subway station; (2) the number of residents within the neighborhood was more than 1,000. Within each selected neighborhood, trained interviewers conducted at least 100 self-administered intercept surveys in May 2017. The inclusion criteria for participants were (1) being 18-70 years old; (2) having lived in the selected neighborhood for more than 3 months; and (3) being



1  
2  
3 physically capable of riding a bicycle. Altogether, 1265 respondents were sampled from  
4  
5 12 neighborhoods. After excluding 100 respondents with more than 20% missing data,  
6  
7 1165 respondents (92.1%) remained in the analysis.  
8  
9

## 10 11 12 **Measurements**

### 13 14 **Travel mode**

15  
16 Travel mode before and after the advent of the dock-less PBSPs was assessed by asking  
17  
18 respondents two questions: (1) How did you travel most of the time before the advent of  
19  
20 dock-less PBSPs? (2) How have you been travelling most of the time after the advent of  
21  
22 dock-less PBSPs? Respondents selected one of the following options, including walking,  
23  
24 cycling, by car, public transport (subway, bus, ferry, and shuttle bus),  
25  
26 motorcycles/electric motorcycles, combined public transport with walking (>500m),  
27  
28 combined public transport with cycling, do not travel (staying at home), and other.  
29  
30 According to respondents' travel mode before and after the advent of dock-less PBSPs,  
31  
32 they were classified into cyclists and non-cyclists at both time points. Cyclists were  
33  
34 defined as participants who traveled by bicycle or those who combined cycling and  
35  
36 public transport most of the time.  
37  
38  
39  
40  
41  
42  
43  
44

### 45 **Perceived bikeability**

46  
47 To date, only few instruments have been developed to measure perceived bicycle-  
48  
49 friendliness of neighborhood environments and most of these were developed for the  
50  
51 physical environments of Western countries.<sup>31</sup> A new scale for measuring Chinese  
52  
53 neighborhood bikeability was developed based on existing instruments, literature  
54  
55  
56  
57  
58  
59  
60

1  
2  
3 reviews, field visits, and expert consultation. Specifically, we adopted five questions (i.e.,  
4 distance to a public transportation stop/station, access to destinations, physical condition  
5 of bicycle lanes, maintenance of lanes, and vegetation/shade along the bicycle lanes)  
6  
7 from the Chinese Walkable Environment Scale (CWES) for urban community  
8 residents.<sup>32</sup> Based on consultation with several Chinese local physical activity experts to  
9  
10 discuss potential correlates and determinants of cycling, we added four questions to the  
11 survey, including the presence of dedicated bicycle lanes, and the degree to which traffic  
12 violations, traffic volume, and motorbikes/electric scooters impede cycling. Finally, this  
13 instrument was pilot-tested and adjusted prior to the survey. All bikeability variables  
14 were on a 5-point scale and the composite score was analyzed as a continuous variable.  
15  
16 More details about the questions are provided in Appendix 1.  
17  
18  
19  
20  
21  
22  
23  
24  
25  
26  
27  
28  
29  
30

### 31 **Social norms**

32  
33 Two survey items assessed social norms: “Riding dock-less shared bicycles is  
34 fashionable” and “Riding dock-less shared bicycles represents low socioeconomic  
35 status”. Each item was rated on a 5-point scale, from 1 (strongly disagree) to 5 (strongly  
36 agree).  
37  
38  
39  
40  
41  
42  
43  
44

### 45 **Demographic variables and other covariates**

46  
47 Self-reported sociodemographic variables included gender, age, education, personal  
48 monthly income, and marital status. Age was categorized as <30, 30-49, and ≥50 years.  
49  
50 Educational attainment was categorized as ≤ junior high school, high school/technical  
51 secondary school, junior college, and university and higher. Monthly income was  
52  
53  
54  
55  
56  
57  
58  
59  
60

1  
2  
3 categorized as <¥2000, ¥2000-4999, ¥5000-9999, and  $\geq$ ¥10000 (1 CNY=0.15 USD in  
4  
5  
6 May 2017). In addition, questions about motor vehicle and bicycle ownership and  
7  
8 characteristics of the commute were asked, including the following: (1) what is the  
9  
10 distance between your home and work/college/university, and (2) how long does it take  
11  
12 you to go to work/college/university every day, both of which were converted to  
13  
14  
15 categorical variables.  
16  
17  
18

### 19 **Statistical analysis**

20  
21  
22 McNemar's test was used to examine the change in travel mode after the introduction of  
23  
24 the dock-less PBSPs. To explore the potential correlates of change in travel mode, we  
25  
26 focused on the participants who did not cycle before the bicycle-sharing became available  
27  
28 and classified them as those who (1) changed from not cycling to cycling, and (2)  
29  
30 remained not cycling as their travel mode. More details can be found in Figure 1.  
31  
32

33 Because the data were hierarchical in nature (individuals clustered within  
34  
35 neighborhoods), we explored multi-level modeling. However, upon examination of the  
36  
37 outcome variable, we decided against multi-level modeling because the intraclass  
38  
39 correlation coefficient was 0.0645 and we only found a significant random effect in one  
40  
41 out of 12 neighborhoods. Therefore, logistic regression was conducted to examine the  
42  
43 association of socio-demographic variables, perceived bikeability, and social norms with  
44  
45 change in cycling behavior. Sequential modeling was used with Model 1 including only  
46  
47 sociodemographic variables, Model 2 including sociodemographic and bikeability  
48  
49 variables, and Model 3 additionally including social norms. Statistical analysis was  
50  
51  
52 performed using the Statistical Package for the Social Sciences 20.0 (Chicago, SPSS,  
53  
54  
55  
56  
57  
58  
59  
60

Inc.) and the significance level was set at 0.05.

## RESULTS

The demographic characteristics of the study sample are reported in Table 1. The final sample consisted of 1,165 participants from 12 neighborhoods. Nearly 40% of the participants were 30 to 49 years old, and over 75% were married. More than 40% reported an income level between 2000 and 4999 RMB/month. Over 75% of the participants owned bicycles, while nearly half of the participants had motor vehicles. The average distance from work/college/university was 5.6 km, while the average commuting time was 26.6 minutes.

**Table 1. Participant characteristics**

| Variable | n (%) |
|----------|-------|
|----------|-------|

|                                           |                                        |            |
|-------------------------------------------|----------------------------------------|------------|
| Gender                                    | Male                                   | 587 (50.5) |
|                                           | Female                                 | 575 (49.5) |
| Age, years                                | 18-29                                  | 297 (25.5) |
|                                           | 30-49                                  | 460 (39.5) |
|                                           | ≥50                                    | 408 (35.0) |
| Education                                 | Junior high school                     | 289 (25.2) |
|                                           | High school/technical secondary school | 339 (29.5) |
|                                           | Junior college                         | 210 (18.3) |
|                                           | University and above                   | 310 (27.0) |
| Personal monthly income (RMB)             | <2000                                  | 203 (17.5) |
|                                           | 2000-4999                              | 504 (43.4) |
|                                           | 5000-9999                              | 329 (28.3) |
|                                           | >10000                                 | 125 (10.8) |
| Marital status                            | Married                                | 891 (76.5) |
|                                           | Unmarried/Divorced/Widowed             | 274 (23.5) |
| Area of residence                         | Within the inner ring                  | 284 (24.4) |
|                                           | Between the inner and middle rings     | 265 (22.7) |
|                                           | Between the middle and outer rings     | 316 (27.1) |
|                                           | Beyond the outer ring                  | 300 (25.8) |
| Ownership of bicycle                      | Yes                                    | 879 (75.5) |
|                                           | No                                     | 286 (24.5) |
| Ownership of motor vehicle                | Yes                                    | 550 (47.2) |
|                                           | No                                     | 615 (52.8) |
| Distance from work / college / university | <1.5km                                 | 282 (25.0) |
|                                           | 1.5-5km                                | 432 (38.2) |
|                                           | >5km                                   | 319 (28.2) |
|                                           | Staying at home/ Not working           | 97 (8.6)   |
| Commuting time (one way)                  | <15min                                 | 359 (31.8) |
|                                           | 15-30min                               | 416 (36.8) |
|                                           | >30min                                 | 257 (22.8) |
|                                           | Staying at home / Not working          | 97 (8.6)   |

### Change in travel mode

Before the launch of the dock-less PBSPs, 33.3% of the participants cycled for transport which increased significantly to 48.3% after the launch ( $p<0.001$ ). Among the participants who usually travelled by car/motorcycles/electric motorcycles,

walking/walking combined with public transport, and public transport before the launch of the dock-less PBSPs, there were 115 (28.4%), 50 (28.2%), and 28 (29.2%) participants who adopted cycling as their primary travel mode after the launch, respectively.

### **Correlates of initiating commuting cycling**

As shown in Table 2, in Model 1, among 645 participants who did not report cycling commuting cycling at baseline, those who were <30 and 30-49 years old had more than twice the odds of adopting commuting cycling than participants who were 50 and older. Participants who lived within the inner ring had more than twice the odds to adopt cycling compared with those who lived in the area between the inner and middle rings. Participants living > 5km from work/college/university had more than twice the odds of initiating cycling compared with those living within 1.5km from work/college/university. In Model 2, presence of dedicated bicycle lanes was positively associated with adopting cycling. Model 3 showed that participants who owned motor vehicles were more likely to adopt cycling than those without motor vehicles. In Model 3, access to a public transportation stop/station was inversely associated with adopting cycling, and perceiving riding dock-less shared bicycles as fashionable was positively correlated with adopting cycling. The perception that riding dock-less shared bicycles represents low socio-economic status was inversely correlated with adopting cycling.

**Table 2. Predictors of adopting cycling**

| <b>Demographic characteristics</b>      | Model 1 (n=645) <sup>a</sup><br>OR (95% CI) | Model 2 (n=641) <sup>b</sup><br>OR (95% CI) | Model 3 (n=641) <sup>c</sup><br>OR (95% CI) |
|-----------------------------------------|---------------------------------------------|---------------------------------------------|---------------------------------------------|
| <b>Gender</b>                           |                                             |                                             |                                             |
| Female (ref)                            | 1.00                                        | 1.00                                        | 1.00                                        |
| Male                                    | 0.81 (0.56-1.16)                            | 0.73 (0.50-1.06)                            | 0.75 (0.51-1.11)                            |
| <b>Age (years)</b>                      |                                             |                                             |                                             |
| ≥50 (ref)                               | 1.00                                        | 1.00                                        | 1.00                                        |
| 30-49                                   | 2.26 (1.32-3.87)**                          | 2.31(1.33-4.00)**                           | 2.28(1.30-4.00)**                           |
| <30                                     | 2.23 (1.18-4.21)*                           | 2.11 (1.10-4.07)*                           | 1.92 (0.99-3.74)                            |
| <b>Education</b>                        |                                             |                                             |                                             |
| University and above (ref)              | 1.00                                        | 1.00                                        | 1.00                                        |
| Junior college                          | 0.95 (0.57-1.59)                            | 0.91 (0.53-1.54)                            | 0.86 (0.50-1.48)                            |
| High school/ Technical secondary school | 1.31 (0.79-2.17)                            | 1.30 (0.77-2.18)                            | 1.26 (0.74-2.13)                            |
| Junior high school                      | 0.88 (0.45-1.72)                            | 0.83 (0.42-1.66)                            | 0.75 (0.38-1.52)                            |
| <b>Marital status</b>                   |                                             |                                             |                                             |
| Unmarried/Divorced/ Widowed (ref)       | 1.00                                        | 1.00                                        | 1.00                                        |
| Married                                 | 0.85 (0.53-1.37)                            | 0.85 (0.52-1.39)                            | 0.83 (0.50-1.37)                            |
| <b>Personal monthly income (RMB)</b>    |                                             |                                             |                                             |
| ≥10000 (ref)                            | 1.00                                        | 1.00                                        | 1.00                                        |
| 5000-9999                               | 1.26(0.70-2.27)                             | 1.25 (0.68-2.30)                            | 1.29 (0.70-2.41)                            |
| 2000-4999                               | 1.45 (0.78-2.69)                            | 1.39 (0.74-2.64)                            | 1.43 (0.75-2.74)                            |
| <2000                                   | 0.94 (0.41-2.15)                            | 0.86 (0.37-2.02)                            | 1.01 (0.42-2.41)                            |
| <b>Area</b>                             |                                             |                                             |                                             |
| Within the inner ring (ref)             | 1.00                                        | 1.00                                        | 1.00                                        |
| Between the inner and middle ring       | 0.52 (0.29-0.93)*                           | 0.45 (0.25-0.84)*                           | 0.44 (0.24-0.82)**                          |
| Between the middle and outer ring       | 0.92 (0.56-1.51)                            | 0.78 (0.46-1.31)                            | 0.72 (0.43-1.23)                            |
| Beyond the outer ring                   | 0.69 (0.42-1.15)                            | 0.59 (0.33-1.05)                            | 0.56 (0.31-1.01)                            |
| <b>Ownership of motor vehicle</b>       |                                             |                                             |                                             |
| No (ref)                                | 1.00                                        | 1.00                                        | 1.00                                        |
| Yes                                     | 1.37 (0.95-1.98)                            | 1.45 (0.99-2.12)                            | 1.53 (1.04-2.25)*                           |
| <b>Ownership of bicycle</b>             |                                             |                                             |                                             |
| No (ref)                                | 1.00                                        | 1.00                                        | 1.00                                        |
| Yes                                     | 0.85 (0.54-1.33)                            | 0.84 (0.53-1.35)                            | 0.92 (0.57-1.48)                            |

|                                                                      |                   |                    |                    |
|----------------------------------------------------------------------|-------------------|--------------------|--------------------|
| Distance from work/college/university                                |                   |                    |                    |
| ≤1.5km (ref)                                                         | 1.00              | 1.00               | 1.00               |
| 1.5-5km                                                              | 1.28 (0.73-2.24)  | 1.27 (0.71-2.27)   | 1.33 (0.73-2.39)   |
| >5km                                                                 | 2.04 (1.07-3.90)* | 2.22 (1.13-4.33)*  | 2.58 (1.30-5.12)** |
| Commuting time (one way)                                             |                   |                    |                    |
| ≤15min (ref)                                                         | 1.00              | 1.00               | 1.00               |
| 15-30min                                                             | 0.96 (0.57-1.61)  | 0.97 (0.57-1.65)   | 0.93 (0.54-1.60)   |
| >30min                                                               | 0.84 (0.45-1.58)  | 0.91 (0.48-1.73)   | 0.83 (0.43-1.62)   |
| <b>Perceived bikeability</b>                                         |                   |                    |                    |
| Presence of dedicated bicycle lane                                   |                   | 1.38 (1.12-1.68)** | 1.37 (1.12-1.68)** |
| Access to a public transportation stop/station                       |                   | 0.83 (0.68-1.01)   | 0.82 (0.67-0.99)*  |
| Access to destinations                                               |                   | 0.85 (0.66-1.10)   | 0.81 (0.63-1.06)   |
| Physical condition of bicycle lanes                                  |                   | 1.19 (0.89-1.59)   | 1.15 (0.85-1.54)   |
| Maintenance of lanes                                                 |                   | 0.81 (0.60-1.08)   | 0.82 (0.61-1.11)   |
| Vegetation/shades along the bicycle lanes                            |                   | 1.29 (0.97-1.71)   | 1.23 (0.91,1.65)   |
| Traffic violation as a barrier                                       |                   | 1.01 (0.79-1.29)   | 1.01 (0.79-1.29)   |
| Traffic volume as a barrier                                          |                   | 1.14 (0.87-1.49)   | 1.18 (0.90-1.56)   |
| Motor bikes/electronic scooters as barriers                          |                   | 0.99 (0.76-1.29)   | 0.96 (0.74-1.26)   |
| <b>Social norms</b>                                                  |                   |                    |                    |
| Riding dock-less shared bicycles perceived as fashionable            |                   |                    | 1.46 (1.21-1.76)** |
| Riding dock-less shared bicycles represents low socioeconomic status |                   |                    | 0.91 (0.76-1.08)   |

All analyses are restricted to those who did not report cycling as the main mode of transport at baseline.

<sup>a</sup>Model 1 adjusted for demographic variables, including gender, age, education, marital status, personal monthly income, area, ownership of motor vehicle, ownership of bicycle, distance from work/college/university and commuting time (one way). <sup>b</sup>Model 2 adjusted for all variables in Model 1 + perceived environmental variables, including presence of dedicated bicycle lane, access to a public transportation stop/station, physical condition of bicycle lanes, maintenance of lanes, vegetation/shades along the bicycle lanes, traffic violation as a barrier, traffic volume as a barrier and motor bikes/electronic scooters as



1  
2  
3 barriers. <sup>e</sup>Model 3 adjusted for all variables in Model 2 + social norms variables.  
4 \* $p < 0.05$ , \*\* $p < 0.01$   
5  
6  
7

## 8 **DISCUSSION**

9

10 This is the first community-based study to evaluate the effect of new dock-less PBSPs on  
11 cycling for transport. Over the last 30 years, China has witnessed rapid economic  
12 development and a booming car industry and consequentially, a dramatic decrease in  
13 cycling.<sup>12-14</sup> With the introduction of dock-less PBSPs, we found that the proportion of  
14 participants that cycled for transport increased significantly from 33.3% to 48.3%.  
15 Nearly 30% of the participants who usually travelled by car/motorcycles/electric  
16 motorcycles adopted cycling after the launch of dock-less PBSPs. In comparison, a study  
17 that evaluated conventional PBSPs with docking stations showed that in Beijing,  
18 Shanghai and Hangzhou, 5.2%, 0.46% and 4% of car trips were replaced by bicycle.<sup>33</sup>  
19 Another study on members of bikesharing programs revealed that in Montreal, Toronto,  
20 Washington, DC, Minneapolis-Saint Paul, 40% of members reduced their number of car  
21 trips while only 0.4% of members increased their car trips.<sup>34,35</sup> Studies about PBSPs with  
22 docking stations in Barcelona, London, Montreal and Washington, DC have all reported  
23 low transfer rates from car journeys to shared bicycles.<sup>18,36</sup> It appears that dock-less  
24 PBSPs might have the potential to be more effective and to have a wider reach in  
25 promoting cycling than conventional PBSPs.<sup>20,37</sup> However, it is important to take into  
26 account that the effect sizes are not comparable because our study used individual-level  
27 data and previous evaluations used trip-level data. We offer several potential explanations  
28 for the potentially more effective dock-less PBSPs based on previous studies as follows.  
29  
30 Firstly, enough bicycles per resident (more than 50 bicycles per 1,000 resident in  
31  
32  
33  
34  
35  
36  
37  
38  
39  
40  
41  
42  
43  
44  
45  
46  
47  
48  
49  
50  
51  
52  
53  
54  
55  
56  
57  
58  
59  
60

1  
2  
3 Shanghai) and the GPS positioning function allow for better access to bicycles.<sup>38-40</sup>

4  
5 Secondly, conventional PBSPs in China require local “HuKou” (a permanent residency  
6 system unique to China) and are therefore not available to visitors and temporary  
7 residents. Instead, dock-less PBSPs are available to all who have registered an account  
8 online.<sup>38</sup> Thirdly, a fully dock-less system makes it convenient for users to pick up and  
9 drop off bicycles wherever they want. Fourthly, the provided bicycles are durable,  
10 attractive and practical.<sup>38,40</sup> Lastly, mobile payment is instantaneous and convenient.

11  
12 However, it is important to note that a prerequisite for successful dock-less PBSPs is the  
13 ubiquity of mobile payment, as is the case in China.<sup>41</sup>

14  
15 Based on our preliminary evidence, one may conclude that dock-less PBSPs have great  
16 potential for cycling promotion in China. Perhaps a key ingredient for the success of  
17 dock-less PBSPs in Shanghai is China’s history of cycling as a social norm.<sup>42</sup> Another  
18 reason for the success of dock-less PBSPs is that they have been created and promoted by  
19 the private sector which has vested interest in the wide adoption of shared bicycles.

20  
21 Business competition stimulates continuous development and improvement of bicycle-  
22 sharing technology and promotion of cycling at the population level.<sup>43</sup>

23  
24 However, dock-less PBSPs are not guaranteed to be more effective than conventional  
25 PBSPs in all settings. A report on bike share in the U.S. in 2017 showed that station-  
26 based systems produced an average of 1.7 rides per bike per day, while dock-less bike  
27 share systems nationally had an average of about 0.3 rides per bike per day.<sup>44</sup> Several  
28 factors might explain these differences. Firstly, it is difficult to control the distribution of  
29 dock-less shared bicycles, resulting in insufficient bicycles in some areas and  
30 overcrowding in others.<sup>45</sup> Secondly, nearly one-third of station-based bicycle share  
31  
32  
33  
34  
35  
36  
37  
38  
39  
40  
41  
42  
43  
44  
45  
46  
47  
48  
49  
50  
51  
52  
53  
54  
55  
56  
57  
58  
59  
60

1  
2  
3 systems have income-based discount programs, making renting station-based bicycles  
4 cheaper and potentially more appealing for low-income groups.<sup>44</sup> Thirdly, station-based  
5 and dock-less BSPs may appeal to different types of riders. Some evidence from U.S.  
6 suggests that station-based bicycle share trips are mainly for commuting, while dock-less  
7 bicycle share trips suggested more recreational use.<sup>44</sup>

8  
9  
10 To date, few studies have examined correlates of adopting cycling in the context of newly  
11 introduced PBSPs. With the rapid development and popularity of dock-less PBSPs, it is  
12 necessary to examine potential correlates of adopting commuting cycling. We found that  
13 younger participants were more likely to adopt cycling, which is consistent with previous  
14 studies.<sup>46-48</sup> Gender and education were not related to adopting cycling, which is  
15 consistent with a study conducted in Beijing, but different to results from other studies  
16 from the United States, Spain, and the UK which found that males and those with higher  
17 education were more likely to cycle.<sup>28,47-49</sup> Previous evidence on the associations between  
18 income and cycling was mixed, and our findings suggest no association between income  
19 and change in travel mode.<sup>27,28,47,50</sup> It is noteworthy that we found positive associations of  
20 commuting distance and car ownership with adopting cycling, which is counter-intuitive  
21 and different from previous findings.<sup>47-49,51</sup> A potential explanation is that those who  
22 lived within walking distance (<1.5 km) to work/college/university may not own a car or  
23 have considered cycling, so bicycle-sharing was most likely to affect those who lived  
24 relatively far away from work/college/university and previously traveled by car because  
25 they could not easily access public transportation stops/stations without shared bicycles.  
26  
27 Among the perceived bikeability of the environment, presence of dedicated bicycle lanes  
28 were positively associated with change in travel mode which is in line with several other  
29  
30  
31  
32  
33  
34  
35  
36  
37  
38  
39  
40  
41  
42  
43  
44  
45  
46  
47  
48  
49  
50  
51  
52  
53  
54  
55  
56  
57  
58  
59  
60

1  
2  
3 studies, including some from Beijing.<sup>27,47,51-55</sup> Among them, a study in India suggested  
4 that dedicated bicycle lanes were the most important attribute of bicycle infrastructure.<sup>53</sup>  
5

6  
7 A study from Beijing found that the perception that bicycle lanes being taken over by  
8 motorized vehicles is a key deterrent for people to switch to cycling.<sup>47</sup> On the other hand,  
9  
10 consistent with other studies, we found an inverse association between access to a public  
11 transportation stop/station and adopting cycling.<sup>29,48,55</sup> Unlike some previous studies, we  
12 did not find an association between other aspects of the bikeability of the environment,  
13 such as traffic safety and aesthetics, with adopting cycling.<sup>27,46,49,51,52</sup>  
14  
15

16  
17 Another finding from our study relates to social norms. Although previous studies have  
18 found effects of attitudes towards cycling and other modes of transportation on mode  
19 choice, our study examined effects of both positive and negative attitudes toward  
20 cycling.<sup>56-59</sup> Our data showed that the perception that riding dock-less shared bicycles is  
21 fashionable was positively correlated with adopting cycling while considering riding  
22 dock-less shared bicycles representing low income was inversely correlated with  
23 switching to cycling. This finding highlights that promoting positive social norms may be  
24 critical to increasing cycling at the population level.  
25  
26

27  
28 Dock-less PBSPs provide new opportunities for active travel, but also pose challenges for  
29 their management.<sup>21</sup> Several related issues have been raised: such as road and pedestrian  
30 safety concerns, bicycle dumping, crowding footpath and vandalism.<sup>21,60</sup> We discuss a  
31 few suggestions for better management of PBSP planning and management, as follows.  
32  
33

34  
35 Firstly, public bikesharing operators and local governments should consider what types of  
36 systems are the most effective for linking bikesharing with public transit and vehicle-  
37 sharing systems according to population density and land use.<sup>35,39,61</sup> Secondly, local  
38  
39

1  
2  
3 governments should assess the social and environmental impacts of new bikesharing  
4 programs.<sup>61</sup> Besides quantitative assessment, some in-depth qualitative evaluations  
5  
6 should be encouraged.<sup>62,63</sup> Thirdly, companies that run dock-less bike share programs  
7  
8 should be open to sharing more data about bike usage with local governments to facilitate  
9  
10 evaluations, so that the local governments can better support the development of  
11  
12 bikesharing programs to help achieve goals of safety, equity, and sustainable  
13  
14 mobility.<sup>44,64</sup>  
15  
16  
17  
18  
19  
20

### 21 **Strengths and limitations**

22  
23 There are some limitations to this study. First, all measures were based on self-report,  
24  
25 however, the measures have been validated.<sup>32</sup> Second, this study applied a retrospective  
26  
27 design due to practical reasons outlined earlier. This limits causal inference from the  
28  
29 current study. Third, because we did not collect total physical activity levels at two time  
30  
31 points, we could not determine whether those who have adopted cycling have become  
32  
33 more physically active overall.  
34  
35  
36  
37  
38  
39

### 40 **CONCLUSION**

41  
42 We found that dock-less bicycle-sharing can be effective in increasing bicycle use and  
43  
44 might have the potential to be scaled up internationally. To maximize the impact of dock-  
45  
46 less PBSPs at the population level, improving attributes of the built environment, such as  
47  
48 dedicated bicycle lanes, and promoting positive social norms about cycling should be  
49  
50 considered. The rapid development and popularity of dock-less PBSPs provides new  
51  
52 opportunities for active travel, but also poses challenges for their management. Operators  
53  
54  
55  
56  
57  
58  
59  
60

of dock-less PBSPs and local governments should work together to create better built environment and social norms for promoting active travel and physical activity.

### **Acknowledgements**

We would like to express our sincere thanks all participants for their time and the community organizers from twelve neighborhoods who provided assistance during the field investigation.

### **Contributors**

YJ and HF conceived the idea, analyzed the data and drafted the paper. DD, KG, LC, SZ, and ZM contributed to the writing and assisted with the analysis and interpretation. YJ, LC, SZ, and ZM contributed to collecting the data. All authors have read and approved the final manuscript.

### **Funding**

The work was supported by the Shanghai Municipal Commission of Health and Family Planning (Grant No. 15GWZK1001 & 2013SY006). The funders had no role in study design, data collection and analysis, decision to publish, or preparation of the manuscript.

### **Competing interests**

The authors declare that they have no competing interests.

### **Abbreviations**

1  
2  
3 PA: Physical activity; PBSP: Public bicycle-sharing program; GPS: Global Positioning  
4 System; CWES: Chinese Walkable Environment Scale; SPSS: Statistical Package for the  
5  
6 Social Sciences.  
7  
8  
9

### 10 11 12 **Availability of data and material** 13

14 Please contact authors for data requests.  
15  
16  
17  
18  
19  
20  
21  
22  
23  
24  
25  
26  
27  
28  
29  
30  
31  
32  
33  
34  
35  
36  
37  
38  
39  
40  
41  
42  
43  
44  
45  
46  
47  
48  
49  
50  
51  
52  
53  
54  
55  
56  
57  
58  
59  
60

## REFERENCES

1. 2018 Physical Activity Guidelines Advisory Committee. 2018 Physical Activity Guidelines Advisory Committee Scientific Report. Washington, DC: U.S. Department of Health and Human Services 2018.
2. Althoff T, Sosic R, Hicks JL, *et al.* Large-scale physical activity data reveal worldwide activity inequality. *Nature* 2017;547(7663):336-9.
3. Guthold, R., Stevens, G. A., Riley, L. M, *et al.* Worldwide trends in insufficient physical activity from 2001 to 2016: a pooled analysis of 358 population-based surveys with 1.9 million participants. *Lancet Glob Health* 2018. doi:10.1016/S2214-109X(18)30357-7.
4. Lee IM, Shiroma EJ, Lobelo F, *et al.* Effect of physical inactivity on major non-communicable diseases worldwide: an analysis of burden of disease and life expectancy. *Lancet* 2012;380(9838):219-29.
5. Ding D, Lawson KD, Kolbe-Alexander TL, *et al.* The economic burden of physical inactivity: a global analysis of major non-communicable diseases. *Lancet* 2016;388(10051):1311-24.
6. Berrigan D, Troiano RP, McNeel T, *et al.* Active transportation increases adherence to activity recommendations. *Am J Prev Med* 2006;31(3):210-6.
7. Donaire-Gonzalez D, de Nazelle A, Cole-Hunter T, *et al.* The added benefit of bicycle commuting on the regular amount of physical activity performed. *Am J Prev Med* 2015;49(6):842-9.
8. Kelly P, Kahlmeier S, Goetschi T, *et al.* Systematic review and meta-analysis of reduction in all-cause mortality from walking and cycling and shape of dose response



- 1  
2  
3 relationship. *Int J Behav Nutr Phys Act* 2014;11(132).  
4  
5 9. Oja P, Titze S, Bauman A, *et al.* Health benefits of cycling: a systematic review.  
6  
7 *Scand J Med Sci Sports* 2011;21(4):496-509.  
8  
9  
10 10. Saunders LE, Green JM, Petticrew MP, *et al.* What are the health benefits of active  
11  
12 travel? A systematic review of trials and cohort studies. *PLoS One* 2013;8(e699128).  
13  
14 11. Celis-Morales CA, Lyall DM, Welsh P, *et al.* Association between active  
15  
16 commuting and incident cardiovascular disease, cancer, and mortality: prospective  
17  
18 cohort study. *BMJ* 2017;357:(j1456).  
19  
20  
21 12. Christensen, H.R. Is the Kingdom of bicycles rising again? Cycling, gender, and  
22  
23 class in postsocialist China. *Transfers: Interdisciplinary Journal of Mobility Studies*  
24  
25 2017;7(2):1-20.  
26  
27  
28 13. Tang Yang, Liu Weiwei, Pan Haixiao. The impact of urban policy on the  
29  
30 development of bicycles and cycling in Shanghai, in Urban and rural governance and  
31  
32 planning reform -- 2014 annual meeting of China's urban planning: Haikou, Hainan,  
33  
34 China.  
35  
36  
37 14. Gong Weiyan, Feng Ganyu, Yuan Fan, *et al.* Analysis on the changing trends of  
38  
39 transportation modes and time among Chinese non-agricultural professional population  
40  
41 in 2002 and 2010-2012. *Acta Nutrimenta Sinica* 2017;4:327-31.  
42  
43  
44 15. Zhang Y, Thomas T, Brussel MJG, *et al.* Expanding bicycle-sharing systems:  
45  
46 lessons learnt from an analysis of usage. *PLoS One* 2016;11(e016860412).  
47  
48  
49 16. DeMaio P. Bike-sharing: history, impacts, models of provision, and future. *Journal*  
50  
51 *of Public Transportation* 2014;12(4).  
52  
53  
54 17. Shaheen, SA, Guzman S, Zhang H. Bikesharing in Europe, the Americas, and Asia:  
55  
56  
57  
58  
59  
60

- 1  
2  
3 past, present, and future. *Transportation Research Record* 2010;(2143):159-67.  
4  
5  
6 18. Fishman E, Washington S, Haworth N. Bike share: a synthesis of the literature.  
7  
8 *Transp Rev* 2013;33(2):148–65.  
9  
10 19. Liu Qilu. Study on the behavioral influencing factors of the choice of the public  
11  
12 bicycle users in Jinhua. *Business* 2016;(16):62-3.  
13  
14 20. Feng Xuemin. Analysis on the current situation and countermeasures of the use of  
15  
16 public bicycles in Xi'an. *China Market* 2016;(32):180-1.  
17  
18 21. Ding, D., Jia, Y., Gebel, K.. Mobile bicycle sharing: the social trend that could  
19  
20 change how we move. *Lancet Public Health* 2018;3(5), e215. doi:10.1016/S2468-  
21  
22 2667(18)30066-5.  
23  
24 22. Lin Jun. Mobile bicycle-sharing: the new favorite travel mode. Sina website.  
25  
26 <http://finance.sina.com.cn/roll/2016-12-06/doc-ifyxyiyq2548321.shtml>. Accessed 12  
27  
28 Dec 2017.  
29  
30 23. Ministry of Transport of the People's Republic of China: a total of 10 million mobile  
31  
32 shared bicycles had been deployed in China and overdose in some areas. Cankaoxiaoxi  
33  
34 website. <http://www.cankaoxiaoxi.com/china/20170523/2030603.shtml>. Accessed 25  
35  
36 Sep 2017.  
37  
38 24. Yu Xiao. Additional shared bicycles are banned in Shanghai; there are over 1.5  
39  
40 million mobile shared bicycles. Guangming website. [http://politics.gmw.cn/2017-](http://politics.gmw.cn/2017-08/20/content_25733044.htm)  
41  
42 [08/20/content\\_25733044.htm](http://politics.gmw.cn/2017-08/20/content_25733044.htm). Accessed 26 Sep 2017.  
43  
44 25. Mobike. Bike-sharing and the city - 2017 White Paper. Shanghai: Mobike, 2017.  
45  
46 [https://mobike.com/global/public/Mobike%20-%20White%20Paper%202017\\_EN.pdf](https://mobike.com/global/public/Mobike%20-%20White%20Paper%202017_EN.pdf).  
47  
48 Accessed 9 Mar 2018.  
49  
50  
51  
52  
53  
54  
55  
56  
57  
58  
59  
60

- 1  
2  
3 26. Sallis JF, Owen N. Ecological models of health behavior. In: Glanz K, Rimer BK,  
4 Viswanath K, editors. Health behavior and health education: theory, research and  
5  
6 practice (4<sup>th</sup> ed.). San Francisco: Jossey-Bass; 2015. pp. 43-64.  
7  
8  
9  
10 27. Pucher J, Buehler R. Why Canadians cycle more than Americans: a comparative  
11  
12 analysis of bicycling trends and policies. *Transport Policy* 2006;13(3):265-79.  
13  
14 28. Zahran S, Brody SD, Maghelal P, *et al.* Cycling and walking: explaining the spatial  
15  
16 distribution of healthy modes of transportation in the United States. *Transportation*  
17  
18 *Research Part D: Transport and Environment* 2008;13(7):462-70.  
19  
20 29. Braun LM, Rodriguez DA, Cole-Hunter T, *et al.* Short-term planning and policy  
21  
22 interventions to promote cycling in urban centers: findings from a commute mode  
23  
24 choice analysis in Barcelona, Spain. *Transportation Research Part A: Policy and*  
25  
26 *Practice* 2016;89:164-83.  
27  
28  
29  
30 30. Gao Rui. There are more than 1 million mobile shared bicycles and more than 13  
31  
32 million registered users in Shanghai. Eastday website.  
33  
34 <http://sh.eastday.com/m/20170614/u1a13043063.html>. Accessed 26 May 2017.  
35  
36  
37 31. Wahlgren L, Stigell E, Schantz P. The active commuting route environment scale  
38  
39 (ACRES): development and evaluation. *Int J Behav Nutr Phys Act* 2010;7(58).  
40  
41  
42 32. Zhou R, Fu H, Luo J, *et al.* Evaluation on reliability and validity of the Chinese  
43  
44 Walkable Environment Scale for urban community residents. *Chinese Journal of Public*  
45  
46 *Health* 2011;(07):841-3.  
47  
48  
49 33. Yang T, Haixiao P, Qing S. Bike-sharing systems in Beijing, Shanghai and  
50  
51 Hangzhou and their impact on travel behaviour. Transportation Research Board Annual  
52  
53 Meeting 2011, Washington, DC.  
54  
55  
56  
57  
58  
59  
60

- 1  
2  
3 34. Shaheen S, Martin E. Unraveling the modal impacts of bikesharing. *Access*  
4 *Magazine* 2015; Available at: [https://www.accessmagazine.org/fall-2015/unraveling-](https://www.accessmagazine.org/fall-2015/unraveling-the-modal-impacts-of-bikesharing/)  
5 [the-modal-impacts-of-bikesharing/](https://www.accessmagazine.org/fall-2015/unraveling-the-modal-impacts-of-bikesharing/).  
6  
7  
8  
9  
10 35. Shaheen S, Martin E, Cohen A. Public bikesharing and modal shift behavior: a  
11 comparative study of early bikesharing systems in North America. *International Journal*  
12 *of Transportation* 2013; 1(1): 35-54.  
13  
14  
15  
16 36. Fuller D, Gauvin L, Kestens Y, *et al*. The potential modal shift and health benefits  
17 of implementing a public bicycle share program in Montreal, Canada. *International*  
18 *Journal of Behavioral Nutrition and Physical Activity* 2013;10(66).  
19  
20  
21  
22  
23 37. Zhu Wei, Pang Yuqi, Wang De, *et al*. Travel behavior change after the introduction  
24 of public bicycle systems: a case study of Minhang District, Shanghai. *Urban Planning*  
25 *Forum* 2012;(05):76-81.  
26  
27  
28  
29  
30 38. Borecki N, Buck D, Chung P, *et al*. Virginia Tech Capital Bikeshare Study. 2012;  
31 available at <https://ralphbu.files.wordpress.com/2012/01/vt-bike-share-study-final3.pdf>.  
32  
33  
34  
35 39. Nair R, Miller-Hooks E, Hampshire R, Busic A. Large-scale vehicle sharing  
36 systems: an analysis of Vélib. *International Journal of Sustainable Transportation*  
37 2013;7(1): 85-106.  
38  
39  
40  
41  
42 40. Institute for Transportation and Development Policy. Riding the bike-share boom:  
43 the top five components of a successful system. 2013; Available at [www.itdp.org/riding-](http://www.itdp.org/riding-the-bike-share-boom-the-top-five-components-of-a-successful-system/)  
44 [the-bike-share-boom-the-top-five-components-of-](http://www.itdp.org/riding-the-bike-share-boom-the-top-five-components-of-a-successful-system/)  
45 [a-successful-system/](http://www.itdp.org/riding-the-bike-share-boom-the-top-five-components-of-a-successful-system/).  
46  
47  
48  
49  
50  
51 41. China Internet Network Information Center. China's 39<sup>th</sup> statistical report on  
52 internet development. In: Official statistics for internet development 2016.  
53  
54  
55  
56  
57  
58  
59  
60

1  
2  
3 <http://cnnic.cn/hlwfzyj/hlwxzbg/hlwtjbg/201701/P020170123364672657408.pdf>.

4  
5 Accessed 15 Jan 2017.

6  
7  
8 42. Hongyi G. A study on urban bicycle transportation system. Southwest

9  
10 Transportation University. 2004; 9.

11  
12 43. Kunhao L. A study on the development of urban mobile bicycle-sharing based on  
13 shared economy. *City* 2017;(03):66-9.

14  
15 44. NACTO Bikesharing Annual Report (2010-2017) Summary. Bike share in the U.S.:  
16 2017; Available at: <https://nacto.org/bike-share-statistics-2017/>.

17  
18 45. Gleason R, Miskimins L. Exploring bicycle options for federal lands: bike sharing,  
19 rentals and employee fleets. Report Number FHWA-WFL/TD-12-001, Federal E  
20 Highway Administration. 2012; available at

21  
22 [www.nps.gov/transportation/pdfs/FHWA\\_bicycle\\_options.pdf](http://www.nps.gov/transportation/pdfs/FHWA_bicycle_options.pdf).

23  
24 46. Rietveld P, Daniel V. Determinants of bicycle use: do municipal policies matter?  
25 *Transportation Research Part A: Policy and Practice* 2004;38(7):531-50.

26  
27 47. Yang M, Zacharias J. Potential for revival of the bicycle in Beijing. *International*  
28 *Journal of Sustainable Transportation* 2016;10(6):517-27.

29  
30 48. Cole-Hunter T, Donaire-Gonzalez D, Curto A, *et al*. Objective correlates and  
31 determinants of bicycle commuting propensity in an urban environment. *Transportation*  
32 *Research Part D: Transport and Environment* 2015;40:132-43.

33  
34 49. Parkin J, Wardman M, Page M. Estimation of the determinants of bicycle mode  
35 share for the journey to work using census data. *Transportation* 2008;35(1):93-109.

36  
37 50. Lin, D, Allan A, Cui J. Exploring differences in commuting behaviour among  
38 various income groups during polycentric urban development in China: new evidence  
39

1  
2  
3 and its implications. *Sustainability* 2016;8(118811).

4  
5 51. Buehler R, Pucher J. Cycling to work in 90 large American cities: new evidence on  
6 the role of bike paths and lanes. *Transportation* 2012;39(2):409-32.

7  
8 52. Wahlgren L, Schantz P. Exploring bikeability in a suburban metropolitan area using  
9 the active commuting route environment scale (ACRES). *International Journal of  
10 Environmental Research and Public Health* 2014;11(8):8276-8300.

11  
12 53. Basu S, Vasudevan V. Effect of bicycle friendly roadway infrastructure on bicycling  
13 activities in urban India, in *Procedia - Social and Behavioral Sciences*. Chakroborty P,  
14 Reddy HK, Amekudzi A (eds). 2013;104:1139-48.

15  
16 54. Burk D. Infrastructure, social practice, and environmentalism: the case of bicycle-  
17 commuting. *Social Forces* 2017;95(3):1209-36.

18  
19 55. Zhao P. The impact of the built environment on bicycle commuting: evidence from  
20 Beijing. *Urban Studies* 2014;51(5):1019-37.

21  
22 56. Thigpen CG, Driller BK, Handy SL. Using a stages of change approach to explore  
23 opportunities for increasing bicycle commuting. *Transportation Research part D:  
24 Transport and Environment* 2015;39:44-55.

25  
26 57. Schoner JE, Cao J, Levinson DM. Catalysts and magnets: built environment and  
27 bicycle commuting. *Journal of Transport Geography* 2015;47:100-8.

28  
29 58. Willis DP, Manaugh K, El-Geneidy A. Cycling under influence: summarizing the  
30 influence of perceptions, attitudes, habits, and social environments on cycling for  
31 transportation. *International Journal of Sustainable Transportation* 2015;9(8):565-79.

32  
33 59. Okraszewska R. The impact of organizational culture on bicycle commuting  
34 frequency: the research based on example of three IT companies, in *Springer*

- 1  
2  
3 Proceedings in Business and Economics. Bak M (Ed.). 2016. pp. 201-10.  
4  
5  
6 60. Martin E, Cohen A, Botha J, Shaheen S. Bikesharing and bicycle safety. San Jose,  
7  
8 CA: Mineta Transportation Institute. 2016; Available at  
9  
10 <http://transweb.sjsu.edu/PDFs/research/1204-bikesharing-and-bicycle-safety.pdf>.  
11  
12 61. Shaheen S, Martin E, Chan N, *et al.* Public bikesharing in North America during a  
13  
14 period of rapid expansion: understanding business models, industry trends and user  
15  
16 impacts. 2014; available at <http://transweb.sjsu.edu/project/1131.html>.  
17  
18  
19 62. Tian ZP, Wang JQ, Wang J, Zhang HY. A multi-phase QFD-based hybrid fuzzy  
20  
21 MCDM approach for performance evaluation: a case of smart bike-sharing programs in  
22  
23 Changsha. *Journal of Cleaner Production* 2018; 171:1068-83.  
24  
25  
26 63. Tian ZP, Wang JQ, Zhang HY. An integrated approach for failure mode and effects  
27  
28 analysis based on fuzzy best-worst, relative entropy, and VIKOR methods. *Applied Soft*  
29  
30 *Computing* 2018; DOI: 10.1016/j.asoc.2018.03.037.  
31  
32  
33 64. Cohen A, Shaheen S. Planning for shared mobility. American Planning Association.  
34  
35  
36 2016; Available at: <https://www.planning.org/publications/report/9107556/>.  
37  
38  
39  
40  
41  
42  
43  
44  
45  
46  
47  
48  
49  
50  
51  
52  
53  
54  
55  
56  
57  
58  
59  
60

1  
2  
3  
4  
5  
6  
7  
8  
9  
10  
11  
12  
13  
14  
15  
16  
17  
18  
19  
20  
21  
22  
23  
24  
25  
26  
27  
28  
29  
30  
31  
32  
33  
34  
35  
36  
37  
38  
39  
40  
41  
42  
43  
44  
45  
46  
47  
48  
49  
50  
51  
52  
53  
54  
55  
56  
57  
58  
59  
60

**Figure 1. Participants flow**

For peer review only



1  
2  
3  
4  
5  
6  
7  
8  
9  
10  
11  
12  
13  
14  
15  
16  
17  
18  
19  
20  
21  
22  
23  
24  
25  
26  
27  
28  
29  
30  
31  
32  
33  
34  
35  
36  
37  
38  
39  
40  
41  
42  
43  
44  
45  
46  
47  
48  
49  
50  
51  
52  
53  
54  
55  
56  
57  
58  
59  
60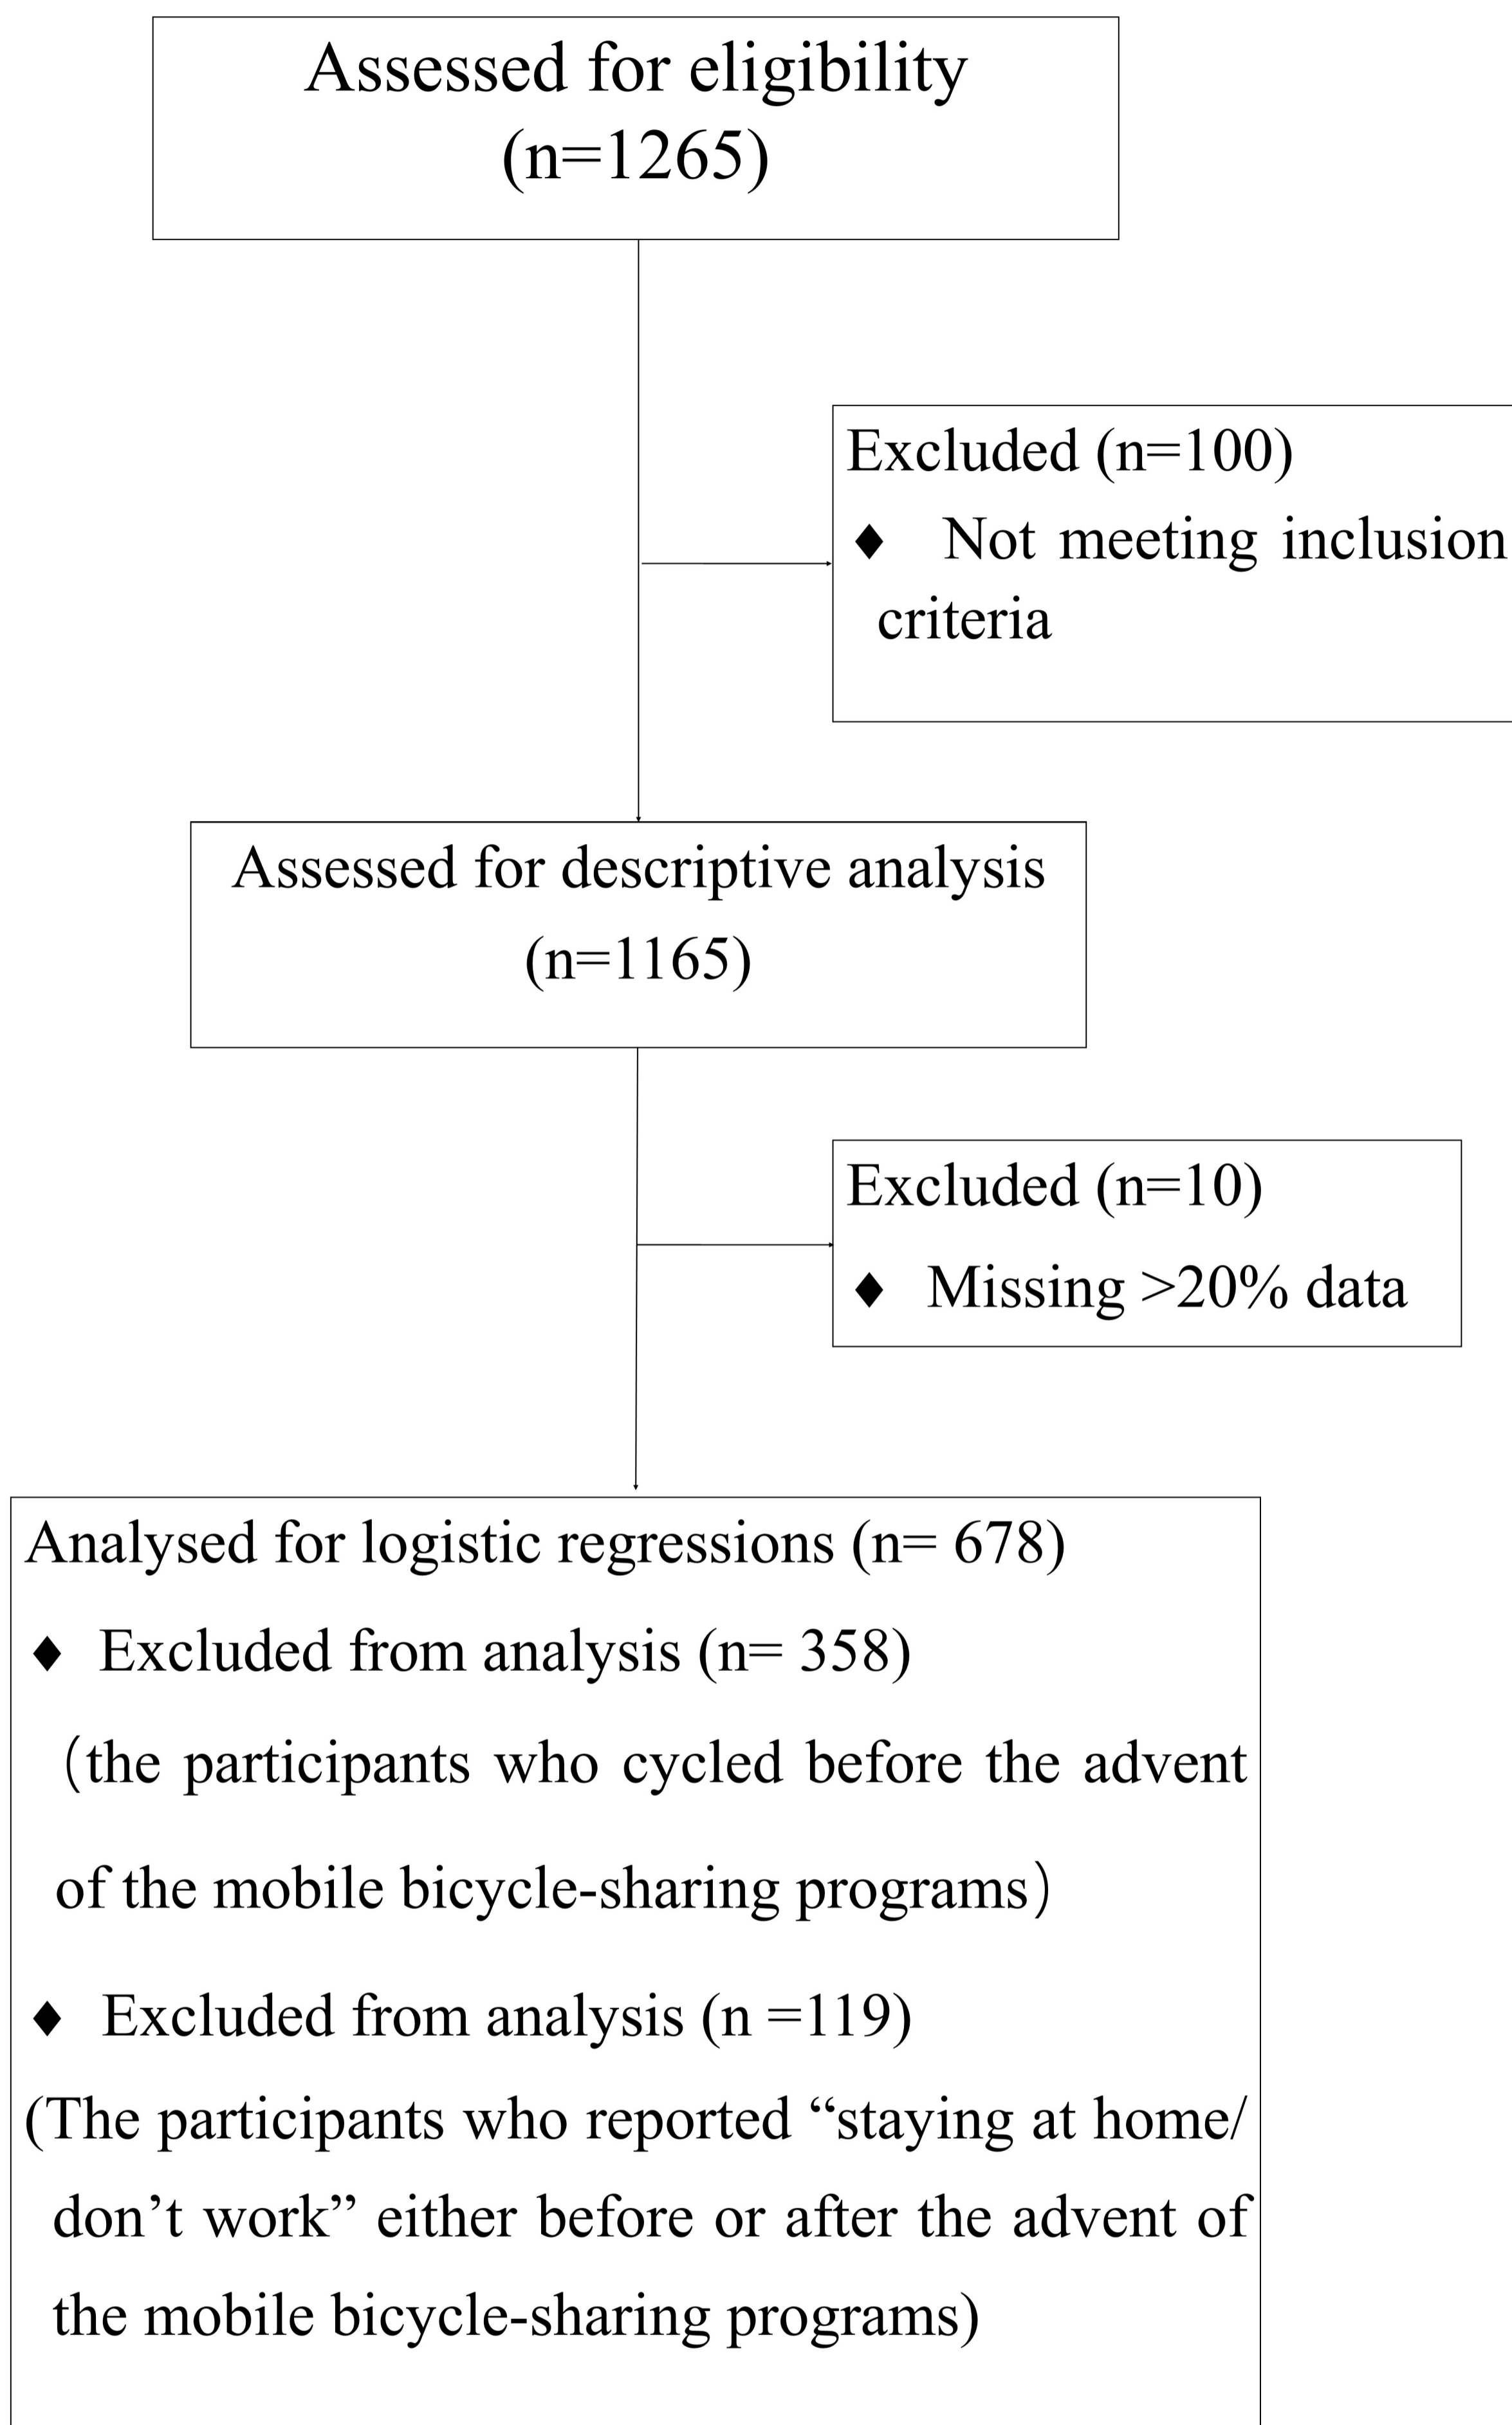

1  
2  
3  
4  
5  
6  
7  
8  
9  
10  
11  
12  
13  
14  
15  
16  
17  
18  
19  
20  
21  
22  
23  
24  
25  
26  
27  
28  
29  
30  
31  
32  
33  
34  
35  
36  
37  
38  
39  
40  
41  
42  
43  
44  
45  
46

**Appendix 1**

**Table 1. The questions measuring bikeable neighborhood environment.**

| Questions                                                                                          | Rating  |               |           |                 |         |
|----------------------------------------------------------------------------------------------------|---------|---------------|-----------|-----------------|---------|
|                                                                                                    | 1       | 2             | 3         | 4               | 5       |
| 1. Among the surrounding roads, how many dedicated bicycle lanes are set up?                       | none    | a few         | half      | most            | all     |
| 2. Distance from neighborhood to a public transportation stop/station (subway station/bus station) | >2km    | 1-2km         | 0.5- <1km | 0.2 km - <0.5km | <0.2km  |
| 3. Access to destinations such as supermarkets, pharmacy, and small market                         | poor    | a little poor | moderate  | good            | perfect |
| 4. Physical condition of bicycle lanes                                                             | poor    | a little poor | moderate  | good            | perfect |
| 5. Maintenance of lanes                                                                            | poor    | a little poor | moderate  | good            | perfect |
| 6. Vegetation/shade along bicycle lanes                                                            | poor    | a little poor | moderate  | good            | perfect |
| 7. Obstruction through traffic violation                                                           | serious | some          | moderate  | a little        | little  |
| 8. Obstruction through motor vehicles                                                              | serious | some          | moderate  | a little        | little  |
| 9. Obstruction through motorbikes / electric motorcycles                                           | serious | some          | moderate  | a little        | little  |

## STROBE Statement—checklist of items that should be included in reports of observational studies

|                              | Item No | Recommendation                                                                                                                                                                                                                                                                                                                                                                                                                                                                                                                                                                                                |
|------------------------------|---------|---------------------------------------------------------------------------------------------------------------------------------------------------------------------------------------------------------------------------------------------------------------------------------------------------------------------------------------------------------------------------------------------------------------------------------------------------------------------------------------------------------------------------------------------------------------------------------------------------------------|
| <b>Title and abstract</b>    | 1       | (a) Indicate the study's design with a commonly used term in the title or the abstract<br>– <i>In the abstract we explicitly mentioned it is a retrospective natural experimental study</i>                                                                                                                                                                                                                                                                                                                                                                                                                   |
|                              |         | (b) Provide in the abstract an informative and balanced summary of what was done and what was found<br>– <i>Clearly stated in abstract.</i>                                                                                                                                                                                                                                                                                                                                                                                                                                                                   |
| <b>Introduction</b>          |         |                                                                                                                                                                                                                                                                                                                                                                                                                                                                                                                                                                                                               |
| Background/rationale         | 2       | Explain the scientific background and rationale for the investigation being reported<br>– <i>Clearly stated in the Introduction</i>                                                                                                                                                                                                                                                                                                                                                                                                                                                                           |
| Objectives                   | 3       | State specific objectives, including any prespecified hypotheses<br>– <i>Objective stated at the end of the Introduction</i>                                                                                                                                                                                                                                                                                                                                                                                                                                                                                  |
| <b>Methods</b>               |         |                                                                                                                                                                                                                                                                                                                                                                                                                                                                                                                                                                                                               |
| Study design                 | 4       | Present key elements of study design early in the paper<br>– <i>Stated at the start of Methods</i>                                                                                                                                                                                                                                                                                                                                                                                                                                                                                                            |
| Setting                      | 5       | Describe the setting, locations, and relevant dates, including periods of recruitment, exposure, follow-up, and data collection<br>– <i>Stated in Methods</i>                                                                                                                                                                                                                                                                                                                                                                                                                                                 |
| Participants                 | 6       | (a) <i>Cohort study</i> —Give the eligibility criteria, and the sources and methods of selection of participants. Describe methods of follow-up<br><i>Case-control study</i> —Give the eligibility criteria, and the sources and methods of case ascertainment and control selection. Give the rationale for the choice of cases and controls<br><i>Cross-sectional study</i> —Give the eligibility criteria, and the sources and methods of selection of participants<br>– <i>eligibility criteria, sources and methods of selection were stated in Methods(Study areas and recruitment of participants)</i> |
|                              |         | (b) <i>Cohort study</i> —For matched studies, give matching criteria and number of exposed and unexposed<br><i>Case-control study</i> —For matched studies, give matching criteria and the number of controls per case<br>– <i>NA</i>                                                                                                                                                                                                                                                                                                                                                                         |
| Variables                    | 7       | Clearly define all outcomes, exposures, predictors, potential confounders, and effect modifiers. Give diagnostic criteria, if applicable<br>– <i>Clearly defined in Methods</i>                                                                                                                                                                                                                                                                                                                                                                                                                               |
| Data sources/<br>measurement | 8*      | For each variable of interest, give sources of data and details of methods of assessment (measurement).<br>– <i>References for measures were provided</i><br>Describe comparability of assessment methods if there is more than one group<br>– <i>NA</i>                                                                                                                                                                                                                                                                                                                                                      |
| Bias                         | 9       | Describe any efforts to address potential sources of bias<br>– <i>Stated in discussion section</i>                                                                                                                                                                                                                                                                                                                                                                                                                                                                                                            |
| Study size                   | 10      | Explain how the study size was arrived at<br>– <i>Stated in Methods(Study areas and recruitment of participants)</i>                                                                                                                                                                                                                                                                                                                                                                                                                                                                                          |

1  
2  
3  
4  
5  
6  
7  
8  
9  
10  
11  
12  
13  
14  
15  
16  
17  
18  
19  
20  
21  
22  
23  
24  
25  
26  
27  
28  
29  
30  
31  
32  
33  
34  
35  
36  
37  
38  
39  
40  
41  
42  
43  
44  
45  
46  
47  
48  
49  
50  
51  
52  
53  
54  
55  
56  
57  
58  
59  
60

|                        |    |                                                                                                                                                                                                                                                                                                                                                                                                                                                                                                                                                                                                                                                                                                                                                                                                                                          |
|------------------------|----|------------------------------------------------------------------------------------------------------------------------------------------------------------------------------------------------------------------------------------------------------------------------------------------------------------------------------------------------------------------------------------------------------------------------------------------------------------------------------------------------------------------------------------------------------------------------------------------------------------------------------------------------------------------------------------------------------------------------------------------------------------------------------------------------------------------------------------------|
| Quantitative variables | 11 | Explain how quantitative variables were handled in the analyses. If applicable, describe which groupings were chosen and why<br>– <i>Stated in Methods (Statistical Analysis)</i>                                                                                                                                                                                                                                                                                                                                                                                                                                                                                                                                                                                                                                                        |
| Statistical methods    | 12 | (a) Describe all statistical methods, including those used to control for confounding<br>– <i>Stated in Methods (Statistical Analysis)</i><br>(b) Describe any methods used to examine subgroups and interactions<br>– <i>Stated in Methods (Statistical Analysis)</i><br>(c) Explain how missing data were addressed<br>– <i>Stated in Methods (Statistical Analysis and Figure 1)</i><br>(d) <i>Cohort study</i> —If applicable, explain how loss to follow-up was addressed<br><i>Case-control study</i> —If applicable, explain how matching of cases and controls was addressed<br><i>Cross-sectional study</i> —If applicable, describe analytical methods taking account of sampling strategy<br>– <i>Stated in Methods (Study areas and recruitment of participants)</i><br>(e) Describe any sensitivity analyses<br>– <i>NA</i> |

Continued on next page

## Results

|                   |     |                                                                                                                                                                                                                                                         |
|-------------------|-----|---------------------------------------------------------------------------------------------------------------------------------------------------------------------------------------------------------------------------------------------------------|
| Participants      | 13* | (a) Report numbers of individuals at each stage of study—eg numbers potentially eligible, examined for eligibility, confirmed eligible, included in the study, completing follow-up, and analysed<br>– <i>Presented in Figure 1</i>                     |
|                   |     | (b) Give reasons for non-participation at each stage<br>– <i>Presented in Figure 1</i>                                                                                                                                                                  |
|                   |     | (c) Consider use of a flow diagram<br>– <i>Presented in Figure 1</i>                                                                                                                                                                                    |
| Descriptive data  | 14* | (a) Give characteristics of study participants (eg demographic, clinical, social) and information on exposures and potential confounders<br>– <i>Presented in Table 1</i>                                                                               |
|                   |     | (b) Indicate number of participants with missing data for each variable of interest<br>– <i>NA</i>                                                                                                                                                      |
|                   |     | (c) <i>Cohort study</i> —Summarise follow-up time (eg, average and total amount)<br>– <i>NA</i>                                                                                                                                                         |
| Outcome data      | 15* | <i>Cohort study</i> —Report numbers of outcome events or summary measures over time<br>– <i>NA</i>                                                                                                                                                      |
|                   |     | <i>Case-control study</i> —Report numbers in each exposure category, or summary measures of exposure<br>– <i>NA</i>                                                                                                                                     |
|                   |     | <i>Cross-sectional study</i> —Report numbers of outcome events or summary measures<br>– <i>Presented in Table 1</i>                                                                                                                                     |
| Main results      | 16  | (a) Give unadjusted estimates and, if applicable, confounder-adjusted estimates and their precision (eg, 95% confidence interval). Make clear which confounders were adjusted for and why they were included<br>– <i>Indicated in Results , Table 2</i> |
|                   |     | (b) Report category boundaries when continuous variables were categorized<br>– <i>Indicated in Results , Table 1 and 2</i>                                                                                                                              |
|                   |     | (c) If relevant, consider translating estimates of relative risk into absolute risk for a meaningful time period<br>– <i>NA</i>                                                                                                                         |
| Other analyses    | 17  | Report other analyses done—eg analyses of subgroups and interactions, and sensitivity analyses<br>– <i>Indicated in Results , Table 2</i>                                                                                                               |
| <b>Discussion</b> |     |                                                                                                                                                                                                                                                         |
| Key results       | 18  | Summarise key results with reference to study objectives<br>– <i>Addressed</i>                                                                                                                                                                          |
| Limitations       | 19  | Discuss limitations of the study, taking into account sources of potential bias or imprecision. Discuss both direction and magnitude of any potential bias<br>– <i>Extensively described in Discussion (Strengths and Limitations)</i>                  |
| Interpretation    | 20  | Give a cautious overall interpretation of results considering objectives, limitations, multiplicity of analyses, results from similar studies, and other relevant evidence<br>– <i>Addressed in Discussion</i>                                          |
| Generalisability  | 21  | Discuss the generalisability (external validity) of the study results<br>– <i>Addressed in Discussion</i>                                                                                                                                               |

1  
2  
3  
4  
5  
6  
7  
8  
9  
10  
11  
12  
13  
14  
15  
16  
17  
18  
19  
20  
21  
22  
23  
24  
25  
26  
27  
28  
29  
30  
31  
32  
33  
34  
35  
36  
37  
38  
39  
40  
41  
42  
43  
44  
45  
46  
47  
48  
49  
50  
51  
52  
53  
54  
55  
56  
57  
58  
59  
60**Other information**

---

Funding 22 Give the source of funding and the role of the funders for the present study and, if applicable, for the original study on which the present article is based  
– *Funding and the role of the funder presented.*

\*Give information separately for cases and controls in case-control studies and, if applicable, for exposed and unexposed groups in cohort and cross-sectional studies.

**Note:** An Explanation and Elaboration article discusses each checklist item and gives methodological background and published examples of transparent reporting. The STROBE checklist is best used in conjunction with this article (freely available on the Web sites of PLoS Medicine at <http://www.plosmedicine.org/>, Annals of Internal Medicine at <http://www.annals.org/>, and Epidemiology at <http://www.epidem.com/>). Information on the STROBE Initiative is available at [www.strobe-statement.org](http://www.strobe-statement.org).
