# Supplementary material for: Effects of new dock-less bicycle-sharing programs on cycling: a retrospective study in Shanghai
Source: PubMed Central journal article supplement — BMJ Open. 2019 Feb 9;9(2):e024280. doi: 10.1136/bmjopen-2018-024280 (PMC6398781; doi:10.1136/bmjopen-2018-024280), 2019-02-09
Supplement: bmjopen-2018-024280supp001.pdf [file bmjopen-2018-024280supp001.pdf]

## Appendix 1

**Table 1. The questions measuring bikeable neighborhood environment.**

| Questions                                                                                          | Rating  |               |           |                 |         |
|----------------------------------------------------------------------------------------------------|---------|---------------|-----------|-----------------|---------|
|                                                                                                    | 1       | 2             | 3         | 4               | 5       |
| 1. Among the surrounding roads, how many dedicated bicycle lanes are set up?                       | none    | a few         | half      | most            | all     |
| 2. Distance from neighborhood to a public transportation stop/station (subway station/bus station) | >2km    | 1-2km         | 0.5- <1km | 0.2 km - <0.5km | <0.2km  |
| 3. Access to destinations such as supermarkets, pharmacy, and small market                         | poor    | a little poor | moderate  | good            | perfect |
| 4. Physical condition of bicycle lanes                                                             | poor    | a little poor | moderate  | good            | perfect |
| 5. Maintenance of lanes                                                                            | poor    | a little poor | moderate  | good            | perfect |
| 6. Vegetation/shade along bicycle lanes                                                            | poor    | a little poor | moderate  | good            | perfect |
| 7. Obstruction through traffic violation                                                           | serious | some          | moderate  | a little        | little  |
| 8. Obstruction through motor vehicles                                                              | serious | some          | moderate  | a little        | little  |
| 9. Obstruction through motorbikes / electric motorcycles                                           | serious | some          | moderate  | a little        | little  |
